20 **Abstract**

21           The RhoGTPases are characterized as membrane-associated molecular switches cycling  
22 between active, GTP-bound and inactive, GDP-bound states. However, 90-95% of RhoGTPases  
23 are maintained in a soluble form by RhoGDI, which is generally viewed as a passive shuttle for  
24 inactive RhoGTPases. Our current understanding of RhoGTPase:RhoGDI dynamics has been  
25 limited by two experimental challenges: direct visualization of the RhoGTPases *in vivo* and  
26 reconstitution of the cycle *in vitro*. We developed methods to directly image vertebrate  
27 RhoGTPases *in vivo* or on lipid bilayers *in vitro*. Using these tools, we identified pools of active  
28 and inactive RhoGTPase associated with the membrane, showed that RhoGDI can actively  
29 extract both inactive and active RhoGTPases, and that the extraction of active RhoGTPase  
30 contributes to their spatial regulation around wounds. In contrast to the textbook model of the  
31 RhoGTPase cycle, these results indicate that RhoGDI actively contributes to spatiotemporal  
32 patterning by removing active RhoGTPases from the plasma membrane.

33

34

35

36

37

38

39

40

## 41 **Introduction**

42           The Rho family GTPases, including Rho, Rac and Cdc42, are essential signaling proteins  
43 that mediate morphological changes in cells by directing local cytoskeletal rearrangements  
44 (Bishop & Hall, 2000; Kimura et al., 1996). These rearrangements are generally initiated at and  
45 confined to specific subcellular regions. For example, a narrow, concentrated zone of Rho  
46 activity directs the formation of a ring of actin filaments and myosin-2 at the equatorial cortex  
47 that drives cytokinesis (Bement, Benink, and Von Dassow 2005; Yonemura, Hirao-Minakuchi,  
48 and Nishimura 2004; Yüce, Piekny, and Glotzer 2005). Similarly, Rho, Rac and Cdc42 are  
49 activated near the leading edge of crawling cells in patterns that correspond to local cycles of  
50 protrusion, adhesion and retraction (Machacek et al., 2009; Martin et al., 2016). Because tight  
51 spatiotemporal regulation of the GTPases is a fundamental feature of these cellular processes,  
52 considerable effort has been invested in studying GTPase regulation.

53           The RhoGTPases are classically characterized as cycling between membrane-associated,  
54 active states and soluble, inactive states as a result of interactions with three classes of regulatory  
55 proteins: guanine nucleotide exchange factors (GEFs), which activate GTPases by promoting  
56 exchange of GDP for GTP (Rossman et al. 2005); GTPase activating proteins (GAPs), which  
57 inactivate GTPases by promoting GTP hydrolysis (Moon & Zheng, 2003); and guanine  
58 nucleotide dissociation inhibitor (GDI), which solubilizes GTPases to generate a large reservoir  
59 of heterodimeric GTPase:GDI complexes in the cytoplasm (Garcia-Mata, Boulter, & Burridge,  
60 2011). In the canonical model of GTPase regulation, GTPase cycling is thought to proceed as  
61 follows: a GTPase is activated by a GEF at the plasma membrane following its release from  
62 GDI, is subsequently inactivated by a GAP, and is then returned to the soluble pool by GDI.  
63 Thus, in the canonical model, the lifetime of GTPase activity at the plasma membrane is thought

64 to be controlled entirely by GEFs and GAPs, with GDI essentially serving as a passive shuttle  
65 that interacts exclusively with inactive GTPases.

66 A limitation of this traditional view is that the function and the biochemical activities of  
67 RhoGDI, in contrast to GEFs and GAPs, are not well understood. Presently, no consensus exists  
68 as to i) whether GDI actively extracts GTPases from membranes or merely solubilizes them by  
69 sequestration (Johnson, Erickson, and Cerione 2009; Zhang et al. 2014), ii) whether it interacts  
70 with GTPases in a nucleotide-specific manner (Nomanbhoy & Cerione, 1996; Tnimov et al.,  
71 2012), or iii) how its activity is coordinated with GEFs or GAPs (Garcia-Mata et al., 2011). The  
72 notion that GDI works as a passive shuttle rests largely on two findings. First, when  
73 GTPase:GDI complexes are purified from cell lysates, the great majority of GTPase within the  
74 complex is in the inactive, GDP-bound form (Abo, Webb, Grogan, & Segal, 1994), as expected  
75 if the GDI solubilizes GTPases after inactivation by a GAP. Second, binding of GTPases by GDI  
76 strongly suppresses GTP hydrolysis (Hart et al., 1992), indicating that hydrolysis must precede  
77 the extraction from the membrane. However, other results raise a serious, albeit contentious,  
78 challenge to this idea: multiple studies indicate that GDI binds both inactive and active GTPase  
79 with relatively high affinity *in vitro* (Hancock & Hall, 1993; Hart et al., 1992; Nomanbhoy &  
80 Cerione, 1996; Tnimov et al., 2012), implying that GDI may have the potential to interact with  
81 active as well as inactive GTPase *in vivo*. As such, GDI might have the potential to exert a more  
82 direct role in the regulation of GTPase activity than currently appreciated.

83 Understanding the pattern forming ability of RhoGTPases requires the mechanistic  
84 dissection of the interactions between GTPases and GDI. Unfortunately, our ability to study  
85 GTPase:GDI dynamics has been hampered due to two major experimental limitations: first,  
86 visualization of the GTPases in living cells is limited by the fact that labeling with fluorescent

87 protein on the amino terminus impairs GTPase regulation and function, while carboxy-terminal  
88 labeling prevents GTPase prenylation (Howell et al., 2012; Yonemura et al., 2004). In the  
89 absence of direct visualization, GTPase dynamics must be inferred from activity probes. Second,  
90 with a few important exceptions (Johnson et al., 2009; Nomanbhoy, Erickson, & Cerione, 1999),  
91 *in vitro* studies of GTPase:GDI dynamics have either utilized unprenylated GTPases, omitted  
92 membranes, or both. Additionally, nearly all reconstitution experimentation focused on the effect  
93 of GDI on the distribution between membrane-associated and soluble forms of GTPases at  
94 thermodynamic equilibrium (Zhang et al., 2014). Thus, we do not currently understand how GDI  
95 affects the transitions between membrane and soluble GTPase states kinetically, especially under  
96 conditions which mimic the cellular environment which is far from equilibrium due to the  
97 constant dissipation of energy.

98         To overcome these limitations, we developed two distinct methods to directly visualize  
99 vertebrate RhoGTPases on membranes *in vivo* and or on supported lipid bilayers *in vitro*. Using  
100 these tools, we identify co-existing pools of active and inactive GTPases associated with the  
101 plasma membrane. We also demonstrate that GDI can actively extract GTPases from the  
102 membrane and, unexpectedly, that GDI can extract both inactive and active GTPases. Finally, we  
103 show that the extraction of active GTPase also occurs *in vivo* and that this contributes to the  
104 spatial regulation of GTPase activity. Collectively, these data indicate that the textbook model of  
105 the GTPase cycling must be reassessed because GDI can directly mediate the spatiotemporal  
106 regulation of GTPase activity.

## 107 **Results**

### 108 *Visualization of RhoGTPases around cell wounds*

109           Traditional fusion of fluorescent protein with the amino- or carboxyl-termini of the  
110 RhoGTPases impairs GTPase localization and function (SuppFig1; Yonemura, Hirao-Minakuchi,  
111 and Nishimura 2004). To overcome this problem, we first adapted an approach described by  
112 Bendezú et al. (2015) for labeling of yeast Cdc42. Specifically, we inserted green fluorescent  
113 protein into a solvent-exposed external loop of the *Xenopus* GTPases (see Methods). To test the  
114 internally-tagged (IT) GTPases *in vivo*, we exploited the cell wound repair model in *Xenopus*  
115 *laevis* oocytes where wounding elicits a robust accumulation of active Rho and Cdc42 in  
116 discrete, concentric zones at the cortex (Fig1A; Benink & Bement, 2005). IT-GTPases were co-  
117 expressed with wild-type (WT) GDI to avoid GTPase aggregation (Boulter et al., 2010). Both  
118 IT-Rho and IT-Cdc42 were recruited to concentric rings around the wound (Fig1B,C).  
119 Comparison of IT-Rho to a Rho activity reporter (mRFP-2xrGBD; Davenport et al. 2016)  
120 revealed that IT-Rho spatially overlapped with the Rho activity zone. Comparison of IT-Cdc42  
121 to a Cdc42 activity reporter (mRFP-wGBD; Benink and Bement 2005) revealed that IT-Cdc42  
122 localized throughout the active Cdc42 zone, but extended slightly beyond it towards the wound  
123 center (Fig1B,C; see also below). We also tested the behavior of IT-Rac and found that it  
124 concentrated around wounds in the same region as IT-Cdc42 as expected from previous  
125 experiments (SuppFig2; Abreu-Blanco, Verboon, & Parkhurst, 2014; Benink & Bement, 2001).  
126 These results indicate that the IT and Cy3-tagged GTPase variants can interact with diverse  
127 regulators required to achieve their normal enrichment at wounds.

128           As an alternative approach, and as a means to obtain labeled RhoGTPases that could be  
129 used both *in vivo* and *in vitro*, purified recombinant Rho and Cdc42 were prenylated and coupled

130 to Cy3 via a short N-terminal peptide via sortase-mediated ligation (see Methods). Microinjected  
131 Cy3-Rho and Cy3-Cdc42 localized to wounds (Fig1D,E), in a manner indistinguishable from  
132 their IT counterparts expressed in the oocyte (Fig1F,G). As observed with IT-Rho and IT-Cdc42,  
133 Cy3-Rho completely overlapped with the zone of Rho activity while Cy3-Cdc42 localized  
134 throughout and slightly interior of the active Cdc42 zone.

135

### 136 *Visualization of RhoGTPases in other cellular contexts*

137 To further test the behavior of the IT- and Cy3-labeled RhoGTPases, we sought to  
138 determine if they localize to the plasma membrane in other cellular processes. This is important  
139 because these processes likely depend on different regulators from those that operate during cell  
140 wound repair. IT-Rho and Cy3-Rho localized to the cytokinetic apparatus and epithelial  
141 junctions in *Xenopus* embryos, consistent with previous results obtained with a Rho activity  
142 reporter (Fig2A-C; Bement, Benink, & Von Dassow 2005). Similarly, IT-Cdc42 localized to  
143 exocytosing cortical granules (Fig2D), consistent with previous results obtained with a Cdc42  
144 activity reporter (Yu and Bement 2007). IT-Cdc42 was also recruited to cell-cell junctions and  
145 enriched there upon wounding (Fig2E), a behavior previously revealed using a Cdc42 activity  
146 reporter (Clark et al., 2009).

147 Next, we wanted to determine whether IT-RhoGTPases can functionally substitute for the  
148 endogenous GTPases. The *Xenopus laevis* oocyte system is not conducive to traditional  
149 knockdown approaches due to its large stores of maternal protein and relatively slow protein  
150 turnover. Therefore, we employed C3-exotransferase, a Rho-specific toxin, to inhibit endogenous  
151 Rho activity, and expressed an IT-Rho in which the C3 ribosylation site (N41) is mutated to a

152 residue that cannot be ribosylated (N41V; Sekine, Fujiwara, and Narumiyas 1989). In control  
153 oocytes expressing the probe for active Rho, Rho activity around wounds was suppressed by C3  
154 (Fig 2F,G). In contrast, cells expressing IT-Rho-N41V generated a spatially defined zone of Rho  
155 activity around the wound that closed over similar timescales compared to the control.  
156 Collectively, the above results indicate that both IT- and Cy3-labeled GTPases are faithful  
157 reporters of the distribution of GTPases and show that IT-Rho can functionally substitute for its  
158 endogenous counterpart.

159

#### 160 *Pools of active and inactive RhoGTPase accumulate in the plasma membrane*

161         The observation that Cdc42 extended slightly beyond its zone of activity suggests that  
162 there may be a pool of inactive, membrane-bound Cdc42 at this location. This notion is  
163 consistent with the previous observation that Abr, a Cdc42 GAP thought to regulate Cdc42  
164 activity at wounds, also localizes interior to the Cdc42 zone (Vaughan et al. 2011). To  
165 understand the relationship between activity and membrane-association of Cdc42, we  
166 overexpressed Abr, a manipulation previously shown to decrease Cdc42 activity around wounds  
167 (Vaughan et al., 2011). Remarkably, this resulted in a dose-dependent loss of active Cdc42 at  
168 wounds while having far less effect on Cy3-Cdc42 (Fig3A,B). These results further demonstrate  
169 that the IT- and Cy3-GTPases are functional. More importantly, they demonstrate that substantial  
170 pools of both active and inactive GTPases can be dynamically maintained at the plasma  
171 membrane.

172

173



174 *RhoGDI is recruited to concentrated areas of RhoGTPase activity*

175           Efforts to visualize RhoGDI at the plasma membrane have generally failed (Ngo et al.,  
176 2017), likely because GDI only transiently interacts with GTPases upon release into or extraction  
177 from the membrane. However, we reasoned it might be possible to detect GDI at wound sites due  
178 to the high local concentration of Rho and Cdc42. Indeed, we found that 3xGFP-GDI is enriched  
179 at wounds and overlaps with both the Rho and Cdc42 zones (Fig4A). To confirm that  
180 endogenous GDI also localizes to wounds, antibodies were raised against *X. laevis* GDI  
181 (SuppFig3A) and used to immunolabel wounded oocytes. Consistent with the results obtained  
182 with 3XGFP-GDI, endogenous GDI accumulated at wounds (Fig4B). These results demonstrate  
183 that GDI accumulation occurs at discrete regions of the plasma membrane that are enriched with  
184 its GTPase clients.

185

186 *RhoGDI differentially regulates Rho and Cdc42*

187           The localization of RhoGDI around wounds suggests that it might play an active role in  
188 delivery to or extraction of RhoGTPases from the membrane and thus their spatiotemporal  
189 patterning. As an initial test of this possibility, we overexpressed GDI via mRNA microinjection.  
190 This manipulation potently suppressed both Rho and Cdc42 activity, as well as Cy3-Rho and  
191 Cy3-Cdc42 localization, suggesting that GDI exerts its effects via extraction of the GTPases  
192 (Fig5A). To obtain a more quantitative understanding of the relationship between GDI and  
193 GTPase activity, we microinjected purified GDI (SuppFig3B) at increasing concentrations prior  
194 to wounding. High concentrations of microinjected GDI suppressed both Rho and Cdc42 activity  
195 at wounds (Fig5B,C), consistent with the results obtained from GDI via mRNA-mediated

196 overexpression. However, more modest increases revealed differential effects on Rho and  
197 Cdc42. Specifically, increases between 18-190% in GDI levels (based on proteomic data from  
198 Wühr et al. 2014) resulted in a greater reduction of Cdc42 activity compared to Rho (Fig5C). We  
199 found the same to be true for bovine GDI (SuppFig4). These results show that GDI differentially  
200 impacts Rho and Cdc42 activity *in vivo* and that this effect does not require gross  
201 overexpression.

202

### 203 *RhoGDI extracts active and inactive RhoGTPase in vitro*

204 To directly probe the mechanism by which RhoGDI inhibits Rho and Cdc42 activity *in*  
205 *vivo*, we established a real-time GTPase dissociation assay on supported lipid-bilayers (SLBs)  
206 (Fig6A; SuppFig5; see Methods). The addition of Cy3-Cdc42 to SLBs resulted in their  
207 membrane binding as detected by total internal reflection microscopy (TIRF), which was  
208 dependent on its C-terminal prenyl moiety, as expected (Fig6B). We then studied the time course  
209 of Cdc42 release from SLBs under buffer flow which continuously flushed out unbound proteins  
210 from solution. Spontaneous release of inactive, GDP-bound Cdc42 from the membrane was  
211 rather slow ( $t_{1/2}=37.24\pm 3.05$  sec), however the addition of excess GDI lead to a dramatic  
212 acceleration of dissociation (ca.20-fold; Fig6C; SuppFig3C). To determine whether this was the  
213 result of either simple sequestration in solution or, alternatively, active catalytic extraction of  
214 Cdc42 from membranes, we performed assays in the presence of an alternative solubilizer  
215 (RabGGTase beta) that sequesters the GTPase prenyl moiety (Fig6C). Sequestration alone only  
216 marginally affected the rate of dissociation, demonstrating that GDI actively extracts GTPases  
217 from membranes (Fig6D,E).

218 To characterize membrane extraction more quantitatively, we carried out experiments  
219 over a wide range of RhoGDI concentrations using either inactive (GDP-bound) or active (GTP-  
220 bound, constitutively active) forms of Cdc42 or Rho. We observed that WT RhoGTPases  
221 hydrolyze even GTP analogs such as GTP $\gamma$ S over the long time period (hours) required for  
222 performing a full titration in our SLB assay (data not shown), which lead to them accumulating  
223 in the inactive, GDP-bound form during the course of the experiment. We therefore turned to  
224 two constitutively active GTPase variants -Q61L and G12V- and found that the former was the  
225 most suitable for our *in vitro* assay because of its extremely low rate of spontaneous GTP  
226 hydrolysis. Nonetheless, G12V produced qualitatively similar results in this assay (see SuppFig5  
227 and Supplemental Discussion). Remarkably, GDI was able to extract both inactive (GDP-bound)  
228 and active (GTP-bound, Q61L/Q63L) Cdc42 and RhoA in a concentration-dependent manner  
229 (Fig7A,B). Although GDI extracted GDP-bound GTPase more efficiently than GTP-bound  
230 GTPases (3-5 fold difference), it was still able to effectively facilitate the dissociation of the  
231 latter (Figure 7C-F). The affinities of GDI for the active and inactive GTPases on membranes,  
232 determined by hyperbolic fits to the extraction rates, were surprisingly similar (Cdc42:GDP  
233  $3.41 \pm 0.56 \mu\text{M}$ , Cdc42Q61L:GTP  $14.40 \pm 2.50 \mu\text{M}$ , RhoA:GDP  $5.77 \pm 0.87 \mu\text{M}$ , RhoAQ63L:GTP  
234  $19.58 \pm 2.45 \mu\text{M}$ ). On the other hand, the maximal rates of extraction were not, indicating that the  
235 rate-limiting step of membrane extraction depends on the activity state of GTPases. To  
236 investigate whether extraction of active and inactive GTPases is a conserved ability among GDI  
237 proteins, we also studied mammalian GDI. Similar to its *Xenopus* ortholog, bovine GDI1 was  
238 able to extract both GDP- as well as GTP-bound Cdc42 and RhoA (SuppFig6). These data  
239 clearly demonstrate that GDIs can catalytically extract both inactive and active RhoGTPase from  
240 membranes *in vitro*.

241 *Identification of an extraction-deficient RhoGDI*

242           The canonical RhoGTPase cycle assumes that GDI does not extract GTPase without its  
243 prior inactivation by a GAP (*reviewed by* Garcia-Mata, Boulter, & Burridge 2011). However, the  
244 above results suggest that GDI might directly attenuate GTPase activity at the plasma membrane  
245 via extraction of active GTPase. If this hypothesis is correct, then expression of an extraction-  
246 deficient GDI would influence the spatiotemporal patterning of GTPase activity. We therefore  
247 sought to generate an extraction-deficient GDI that could still initiate contact with GTPases but  
248 fail to extract them from the plasma membrane. Mutants were screened by quantifying their  
249 recruitment to wounds relative to WT GDI, based on the rationale that mutants capable of  
250 binding but not extracting should remain at the membrane longer and thus accumulate at wounds  
251 more than WT GDI.

252           Using this screen, we first tested RhoGDI mutants that were previously reported to be  
253 deficient in extraction (Dransart, Morin, Cherfils, & Olofsson, 2005; Ueyama et al., 2013). None  
254 of these extraction-deficient mutants were recruited to wounds more strongly than WT GDI,  
255 suggesting that they were impaired in binding to GTPases at wounds rather than extraction  
256 (SuppFig7). We therefore designed three novel mutants: (1) the isolated regulatory arm of GDI  
257 that initiates contact with the GTPase but lacks a binding pocket for the hydrophobic prenyl  
258 group ( $\Delta 51-199$ ) and (2,3) mutation of residues E158/9 previously hypothesized to be  
259 responsible for GTPase extraction (Hoffman, Nassar, & Cerione, 2000). GDI mutants  $\Delta 51-199$ ,  
260 E158/9A and E158/9Q were halo-tagged, expressed in oocytes and their recruitment to wounds  
261 was quantified relative to WT GDI. GDI  $\Delta 51-199$  showed minimal recruitment to wounds,  
262 however both GDI E158/9A and E158/9Q showed a significant increase in recruitment to

263 wounds relative to WT GDI, with GDI E158/9Q (GDI-QQ) having the greatest increase  
264 (Fig8A,B).

265 To directly test whether RhoGDI E158/9Q (QQ) is deficient in extraction, its functional  
266 capabilities were tested *in vitro* in the SLB assay. WT GDI was able to extract both GDP-bound  
267 and GTP-bound Cdc42 Q61L from the supported lipid bilayers (Fig8C). In contrast, GDI-QQ  
268 retained most of its ability (less than two-fold reduction) to extract inactive Cdc42 but was  
269 completely deficient in extracting active Cdc42 (Fig8C). Quantitatively similar results were  
270 obtained using Cdc42 G12V (data not shown). The same was found to be true for Rho (Fig8C)  
271 and to be conserved for bovine GDI1 (SuppFig8). These results confirm that the GDI-QQ mutant  
272 is indeed extraction deficient: modestly so for inactive GTPases and completely so for active  
273 GTPases.

274

275 *RhoGDI extracts active RhoGTPase in vivo*

276 We sought to directly test whether RhoGDI can extract active GTPases *in vivo* by  
277 employing GDI-QQ. First, we compared the effects of WT vs. QQ GDI overexpression on  
278 wounded oocytes expressing constitutively-active Cdc42 (G12V). (Q61L could not be used as it  
279 failed to elevate Cdc42 levels around wounds; see SuppFig11 and Supplemental Discussion).  
280 While WT GDI significantly reduced the amount of constitutively-active Cdc42 around wounds,  
281 GDI-QQ did not (Fig9A,B). Second, we compared the effects of WT vs. QQ GDI overexpression  
282 on wounded oocytes microinjected with Cy3-Cdc42 bound to GTP $\gamma$ S. WT GDI significantly  
283 reduced the amount of Cy3-Cdc42(GTP $\gamma$ S) around wounds while GDI-QQ did not (Fig9C,D).

284 Collectively, these data suggest that GDI can extract active GTPase from the plasma membrane  
285 *in vivo*.

286 The above results imply that the extraction of active RhoGTPase by GDI might  
287 contribute to its spatiotemporal patterning *in vivo*. To test this hypothesis, we expressed GDI-QQ  
288 and monitored the consequences on Rho and Cdc42 activity following wounding. Strikingly,  
289 Cdc42 activity around wounds was significantly elevated, in contrast to Rho which was  
290 unaffected (Fig9E,F). To assess whether the increase in activity was due to an increase of total  
291 Cdc42 around wounds as opposed to competition between GDI-QQ and the Cdc42 activity  
292 probe, we repeated the experiment with Cy3-Cdc42. Similar to the results obtained with the  
293 activity reporter, expression of GDI-QQ elevated Cy3-Cdc42 levels around wounds relative to  
294 controls (Fig9G,H). Cumulatively, these data suggest that GDI directly extracts active Cdc42  
295 throughout the Cdc42 zone, and that extraction of active Cdc42 is necessary for its regulation  
296 around wounds.

## 297 Discussion

298 Direct visualization of the RhoGTPases in living cells is essential for the understanding  
299 of their complex spatiotemporal dynamics. We have established two methods to fluorescently  
300 label vertebrate GTPases such that they are functional: internal tagging with a fluorescent protein  
301 or by sortase-mediated labeling with a fluorescent dye. This now provides us with widely  
302 applicable reagents to analyze GTPase function. These probes faithfully mimic the distribution  
303 of the endogenous GTPases based on their comparison to activity reporters in several processes:  
304 cell wound repair, cytokinesis, junctional integrity and epithelial wound repair. Further, the  
305 successful rescue of Rho function at wounds in the presence of C3 by a C3-insensitive mutant of  
306 IT-Rho indicates that these proteins are capable of replacing their endogenous counterparts. It  
307 will be important to assess the ability of IT- or Cy3-labeled GTPases substitute for their  
308 endogenous counterparts in other vertebrate cellular processes in the future, although we note  
309 that IT-Cdc42 has been shown to be functional in fission yeast (Bendezú et al., 2015).  
310 Nonetheless, the combination of the two labeling approaches is powerful as it permits side-by-  
311 side comparison of results obtained *in vivo* and *in vitro*, as demonstrated here.

312 Visualization of functional, labeled RhoGTPases in combination with activity reporters in  
313 living cells led to an unexpected observation: pools of inactive Cdc42 at the plasma membrane.  
314 To the best of our knowledge, this is the first time that inactive GTPases have been detected at  
315 membranes under conditions other than gross GTPase overexpression. Notably, the pool of  
316 inactive Cdc42 spatially coincides with a local Cdc42-GAP, Abr (Vaughan et al. 2011). The pool  
317 of inactive Cdc42 expands with overexpression of Abr, further demonstrating that locally-  
318 inactivated Cdc42 can remain associated with the plasma membrane. This finding has important  
319 mechanistic implications for the regulation of GTPase activity. It suggests that GTP hydrolysis

320 and extraction of GTPases, while are likely indirectly linked, are not necessarily tightly coupled.  
321 This raises the possibility that GTPases might cycle through multiple rounds of activation and  
322 inactivation while remaining associated with the membrane.

323 Remarkably, in addition to the RhoGTPases themselves, GDI also localized to the plasma  
324 membrane in proximity to wounds. The localization of GDI in the same place where the  
325 GTPases are especially abundant implies that its accumulation reflects interaction with is  
326 GTPase clients. Consistent with this idea, GDI mutants deficient in GTPase binding fail to  
327 recruit to wounds (data not shown). It will be important to investigate the detailed mechanism of  
328 GDI localization and the control of its turnover at sites of high GTPase activity in the future.

329 The most significant result of this study is that RhoGDI extracts active GTPase,  
330 particularly active Cdc42, during cell wound repair. This finding is based on both *in vitro* assays  
331 showing that WT, but not GDI-QQ, extracts active GTPase from supported lipid bilayers and the  
332 *in vivo* demonstration that WT, but not GDI-QQ, extracts constitutively-active and GTP $\gamma$ S-  
333 loaded Cdc42 from the plasma membrane. We thus conclude that GDI has the capacity to extract  
334 active GTPases. Moreover, this ability is harnessed to limit the level of Cdc42 activity during  
335 cell repair. While this finding may seem heretical, it has the virtue of explaining previous results  
336 in the oocyte wound repair system. That is, based on an indirect approach involving  
337 photoactivatable Rho and Cdc42 activity reporters, it was found that Cdc42 activity is lost  
338 throughout its zone, while Rho activity is preferentially lost at the trailing edge of its zone  
339 (Burkel, Benink, Vaughan, von Dassow, & Bement, 2012). The results presented here suggest  
340 that GDI is responsible for the removal of active Cdc42 throughout the Cdc42 zone while Rho is  
341 inactivated by a trailing edge GAP prior to extraction. This would also explain why a mild  
342 overexpression of GDI significantly reduced Cdc42 activity but had no effect on Rho activity:



343 loss of active Cdc42 can be controlled at the level of GDI while Rho inactivation is controlled at  
344 the level of a GAP (SuppFig9).

345         The broader implications of RhoGDI's ability to extract active GTPase are two-fold.  
346 First, the canonical GTPase cycle needs a new branch in which active GTPase can be directly  
347 extracted from the plasma membrane (Fig10). Further, because GDI binding strongly inhibits  
348 GTP hydrolysis and nucleotide exchange (Hart et al., 1992; Ueda, Kikuchi, Ohga, Yamamoto, &  
349 Takai, 2001), active GTPase may exist in its soluble form in complex with GDI. However,  
350 complementary evidence from biochemical and biological studies suggest that active GTPases  
351 are less stably bound to GDI compared to their inactive form (Hodgson et al., 2016; Slaughter,  
352 Das, Schwartz, Rubinstein, & Li, 2009; Tnimov et al., 2012). As such, the secondary extraction  
353 branch may actually represent a loop through which active GTPases are not only removed from  
354 cellular membranes, but rapidly returned to them (Fig10). Such a mechanism might enhance the  
355 spatial reach of GTPase activity within the plasma membrane or even mediate its spreading  
356 between different membrane compartments (Palamidessi et al., 2008).

357         Second, RhoGDI's ability to extract active GTPase forces us to reassess its role in  
358 GTPase regulation in different cellular processes. While the field primarily studies local GTPase  
359 regulation at the level of GEFs and GAPs, we should reconsider GDI's role in regulation, as well  
360 as the regulation of GDI itself.

361

## 362 **Materials and Methods**

### 363 *Plasmids*

364 The active RhoGTPase probes, mRFP-wGBD, eGFP-wGBD, eGFP-2xrGBD, BFP-  
365 2xrGBD and mRFP-2xrGBD in pCS2+ were generated as previously described (Sokac et al.  
366 2003; Benink and Bement 2005; Davenport et al. 2016). mCh-Rho, mCh-Rac, mCh-Cdc42  
367 (Benink 2005), untagged Rho, Rac, and Cdc42 (wild-type (WT) and constitutively-active  
368 (G12V)) in pCS2+ were made as previously described (Benink and Bement 2005). For  
369 expression and purification in *E. coli*, codon-optimized Cdc42 and RhoA (Eurofins Genomics  
370 Germany GmbH, Ebersberg, Deutschland) were subcloned into a pETMz2 vector via Gibson  
371 assembly cloning (Gibson et al., 2009), with primers GTPase(GeneStrand)fwd and -rev and  
372 pETfwd and -rev (all primer sequences in SuppTable1). A pentaglycine for sortase-mediated  
373 labeling was added onto the 5' of the GTPases. The constitutively-active Cdc42 G12V and RhoA  
374 G14V mutants were generated by Quickchange mutagenesis with primers Cdc42(G12V)fwd and  
375 -rev and RhoA(G14V)fwd and -rev, respectively.

376 *X. laevis* IT-Cdc42 in pCS2+ was generated according to Bendezú et al. (2015): a linker -  
377 SGGSAACSGPPG- was cloned into Cdc42 after Q134. The linker encodes for *BamHI* and *AscI*  
378 restriction sites for digestion and insertion of GFP into the linker region. The 5' end of Cdc42  
379 was amplified with primers Cdc42(1) and Cdc42(2); the 3' end was amplified separately with  
380 primers Cdc42(3) and Cdc42(4). The two products were joined by PCR stitching with primers  
381 Cdc42(1) and Cdc42(4). The single product was digested with *EcoRI* and *XhoI* and ligated into  
382 pCS2+. The resulting construct was mutated by Quickchange with primers pCS2+-Cdc42(1) and  
383 pCS2+-Cdc42(2) to remove the *BamHI* restriction site upstream of the insertion in the multiple  
384 cloning site. eGFP was amplified from eGFP-wGBD with primers eGFP(1) and eGFP(2). Both

385 the Quickchanged construct and eGFP were digested with *Bam*HI and *Asc*I, and eGFP was  
386 ligated into the linker region internal to the Cdc42 coding sequence. *X. laevis* Rho and Rac were  
387 similarly tagged internally after residues Q136 and L134, respectively.

388 *X. laevis* RhoGDI Clone ID:7010361 (GE-Healthcare Dharmacon, Lafayette, CO) was  
389 subcloned into pCS2+ with *Clal* and *Xho*I, and into N'3xGFP and N'Halo (Promega, Madison,  
390 WI) pCS2+ with *Bsp*E1 and *Xho*I. A FLAG-tag was added by PCR onto the 5' of RhoGDI, and  
391 the product was subcloned into pFast-Bac1 with *Clal* and *Not*I. The following mutations were  
392 made by Quickchange mutagenesis to untagged and N'3xGFP RhoGDI in pCS2+: E158/9A,  
393 E158/9Q, D40A, D40N, D180A and D180N (Dransart et al., 2005). Mutant RhoGDI 8(A) had  
394 the first 8 charged amino acids mutated to alanine (D3/5, E11-13, E15-17A) by sequential  
395 PCR (Ueyama et al., 2013). The 3' end of RhoGDI was amplified with primers 8(A)F1 and R1.  
396 The product was amplified and added to at its 5' end with primers 8(A)F2 and R1, and for a third  
397 time with 8(A)F3 and R1. The final PCR product was subcloned into pCS2+ by Infusion PCR  
398 (Takara Bio, Kusatsu, Japan). For subcloning into N'3xGFP-pCS2+, the third PCR from above  
399 was repeated with 8(A)F4 and R2. Mutant RhoGDI helix replacement (HR) had alpha helix D39-  
400 Q48 replaced with a glycine linker GGGGSGGGGS. This was done by sequential PCR as  
401 described above with four rounds of PCR: HR1 and R1, HR2 and R1, HR3 and R1, then either  
402 HR4 and R1 for subcloning into pCS2+ or HR5 and R2 for subcloning into N'3xGFP-pCS2+.  
403 RhoGDI mutant  $\Delta$ 51-199 was generated by adding a stop codon after L50 by Quickchange  
404 mutagenesis. To make RhoGDI  $\Delta$ 1-19, the 3' end of RhoGDI was amplified with primers (-)20  
405 F1 and R for subcloning by infusion into pCS2+, and primers (-)20 F2 and R for N'3xGFP-  
406 pCS2+. Primers (-55) F1, F2 and R were used to generate RhoGDI  $\Delta$ 1-54 as described above  
407 (Hoffman et al., 2000; Ueyama et al., 2013). For expression and purification in *E. coli*, *X. laevis*

408 RhoGDI WT and E158/9Q were subcloned into a pGEX-6P-2 vector via Gibson assembly  
409 cloning (Gibson et al., 2009) using XIRhoGDIfwd and -rev. A cysteine for labeling was added  
410 by PCR onto the 5' of RhoGDI. Bovine RhoGDI1 in pGEX-6P was a gift of Dr. Tomotaka  
411 Komori. E163/4Q mutation was made by Quickchange mutagenesis with the E163/4Qfwd and -  
412 rev primers. Mutant bovine RhoGDI  $\Delta$ 1-22 and  $\Delta$ 1-59 were subcloned with BamHI and NotI  
413 into a pGEX-6P-2 with  $\Delta$ 1-22fwd and -rev and  $\Delta$ 1-59fwd and -rev, respectively. Mutant bovine  
414 RhoGDI HR was generated via Gibson assembly cloning (Gibson et al., 2009), with primers  
415 HRfwd and -rev and pGEXHRfwd and -rev, for amplification of RhoGDI and the  
416 pFASTBacH10 vector, respectively. RabGGTase 2 beta in a pGATEV vector was kindly  
417 provided by Dr. Konstantin Gavriljuk.

418

419 *Expression and purification of recombinant protein from E. coli for sortase-labeling*

420 Rosetta(DE3) chemically competent *E. coli* cells were transformed with WT or mutant  
421 RhoGDIs, induced with 250 $\mu$ M IPTG and incubated at 18°C ON. Bacteria cells were harvested,  
422 centrifuged at 4000xg for 20min, and pellets flash frozen in liquid nitrogen and stored at -80°C.  
423 Frozen pellets were resuspended in a 3x volume of lysis buffer (50mM KPi pH 8, 400mM KCl,  
424 1mM EDTA, 5mM  $\beta$ ME, 1mM PMSF, 1mM benzamidine) and lysed with a high pressure  
425 homogenizer at 4°C. Lysate was clarified by centrifugation at 100,000xg for 1hr and applied to a  
426 glutathione sepharose 4 fast flow column bed (GE-Healthcare, Chicago, IL) equilibrated with  
427 wash buffer (50mM KPi pH 8, 400mM KCl, 1mM EDTA, 5mM BME, 1mM benzamidine). The  
428 column was washed with wash buffer, and protein was eluted with elution buffer (50mM KPi pH  
429 8, 400mM KCl, 1mM EDTA, 5mM BME, 1mM benzamidine, 10mM reduced L-glutathione).  
430 Peak fractions were pooled, protein concentration was estimated with Bradford assay (Bio-Rad

431 Laboratories, Inc., Hercules, CA), and PreScission protease was added at 1:30. After ON  
432 incubation on ice, the sample was concentrated using 5,000 MWCO Vivaspin15R centrifugal  
433 concentrators (Sartorius AG, Göttingen, Germany), buffer exchanged in wash buffer on a HiPrep  
434 26/10 desalting column (GE-Healthcare) and recirculated on the same glutathione sepharose 4  
435 fast flow column bed re-equilibrated in wash buffer. Flow through was collected, concentrated,  
436 spun down and gel filtered on a HiLoad Superdex 75 pg column (GE-Healthcare) in storage  
437 buffer (20mM HEPES pH 7.5, 150mM KCl, 0.5mM TCEP, 20% Glycerol). Peak fractions were  
438 pooled, concentrated, flash frozen in liquid nitrogen and stored at -80°C. Protein purification and  
439 purity were determined by Coomassie stain of 12% SDS-PAGE, protein concentration measuring  
440 absorbance at 280nm. WT and mutant GTPases were expressed and purified similarly to GDIs  
441 with the following differences: L21(DE3) chemically competent *E. coli* cells were used and  
442 proteins were expressed with 1 mM IPTG at 37°C for 4hrs. The affinity step was performed on  
443 HiTrap Chelating HP columns loaded with cobalt and equilibrated in 50mM HEPES pH 7.5,  
444 50mM NaCl, 5mM MgCl<sub>2</sub>, 0.5mM BME, 100μM ATP and 100μM GDP/GTP. RabGTTase Beta  
445 was expressed and purified as described before (Gavriljuk, Itzen, Goody, Gerwert, & Kötting,  
446 2013). After gel filtration, nucleotide bound to Cdc42 G12V was exchange to GTPγS, incubating  
447 the protein with 10-fold excess EDTA and GTPγS for 30 minutes on ice. The new nucleotide  
448 state was stabilized by adding 20-fold excess MgCl<sub>2</sub>. Before freezing, protein buffer was  
449 exchanged with a NAP-5 column (GE-Healthcare) in storage buffer (50mM HEPES pH 7.5,  
450 50mM NaCl, 2mM MgCl<sub>2</sub>, 2mM DTT, 20% Glycerol).

451

452

453 *Cy3-labeling and in vitro prenylation of RhoGTPases*

454 RhoGTPases were labeled at the N-t with Cy3 using a sortase-mediated reaction and *in*  
455 *vitro* prenylated as previously described (Gavriljuk et al., 2013; Popp, Antos, Grotenbreg,  
456 Spooner, & Ploegh, 2007). In brief, RhoGTPases were incubated with sortase and Cy3 N-t  
457 labeled LPETGG peptide at 3:1:15 ratio in labeling buffer (Tris pH 8.0, 150mM KCl, 6 $\mu$ M  
458 CaCl<sub>2</sub>, 0.5mM TCEP) and incubated ON at 16°C. The entire reaction was mixed with  
459 geranylgeranyltransferase type 1 and geranylgeranyl diphosphate at 10:1:30 ratio in prenylation  
460 buffer (50mM HEPES pH 7.5, 50mM NaCl, 2mM MgCl<sub>2</sub>, 2mM DTT, 30 $\mu$ M GDP/GTP, 2%  
461 CHAPS), and incubated ON on a rotating mixer at 4°C. The sample was spun in a TLA-100  
462 rotor (Beckman Coulter, Brea, CA) at 80,000 rpm for 30 minutes at 4°C and gel filtered on a  
463 HiLoad Superdex 75pg column (GE-Healthcare) equilibrated with prenylation buffer with 0.5%  
464 CHAPS. Peak fractions were pooled, concentrated using 5,000 MWCO Vivaspın4 centrifugal  
465 concentrators (Sartorius AG) and buffer exchanged in prenylation buffer without CHAPS on a  
466 NAP-5 column (GE-Healthcare). Residual detergent was removed by Pierce™ Detergent  
467 Removal Spin Column (Thermo Fisher). After sortase-mediated labeling with Cy3, unprenylated  
468 proteins were directly spun down and gel filtered in absence of CHAPS.

469

470 *Oocyte collection and preparation*

471 Ovarian tissue was harvested from adult *X. laevis* via surgical procedures approved by the  
472 University of Wisconsin-Madison Institutional Animal Care and Use Committee. Oocytes were  
473 stored in 1x modified Barth's solution (88mM NaCl, 1mM KCl, 2.4mM NaHCO<sub>3</sub>, 0.82mM  
474 MgSO<sub>4</sub>, 0.33mM NaNO<sub>3</sub>, 0.41mM CaCl<sub>2</sub>, 10mM HEPES, pH 7.4) with 100 $\mu$ g/mL gentamicin

475 sulfate, 6 $\mu$ g/mL tetracycline and 25 $\mu$ g/mL ampicillin at 16°C. Prior to manual defolliculation  
476 with forceps, oocytes were treated with 8mg/mL type I collagenase (Life Technologies, Grand  
477 Island, NY) in 1x modified Barth's solution for 1hr at 16°C on an orbital shaker.

478

#### 479 *mRNA preparation*

480 mRNA was generated *in vitro* using the mMessage mMachine SP6 transcription kit  
481 (Thermo Fisher, Carlsbad, CA) and purified using the RNeasy Mini Kit (Qiagen, Hilden,  
482 Germany). Transcript size was verified on a 1% agarose/formaldehyde denaturing gel relative to  
483 the Millennium Marker (Life Technologies) RNA molecular weight standard.

484

#### 485 *Oocyte microinjection*

486 Oocytes were microinjected with a 40nL injection volume using a p-100 microinjector  
487 (Harvard Apparatus, Holliston, MA). mRNA encoding probes for active Rho (2xrGBD) and  
488 active Cdc42 (wGBD) were injected at a final needle concentration of 30 $\mu$ g/mL and 100 $\mu$ g/mL,  
489 respectively. IT-Rho, Rac and Cdc42 were each injected at a final needle concentration of  
490 125 $\mu$ g/mL, with 63 $\mu$ g/mL of WT RhoGDI to stabilize the exogenous GTPase and maintain  
491 stoichiometric ratio of GTPase:GDI (Boulter et al., 2010). mRNA encoding Abr was injected at a  
492 final needle concentration of 25-500 $\mu$ g/mL. 3xGFP-WT GDI and mutants at 333 $\mu$ g/mL,  
493 untagged RhoGDI at 300 $\mu$ g/mL, Halo-WT GDI and mutants at 200 $\mu$ g/mL, Cdc42 G12V at  
494 28 $\mu$ g/mL, and untagged GDI E158/9Q at 1.5mg/mL. For purified protein, Cy3-Rho and Cy3-  
495 Cdc42, *in vitro* prenylated and complexed with RhoGDI, were injected at a final needle  
496 concentration of 4.56 $\mu$ M. C3 exotransferase was injected at a final needle concentration of

497 1.1 $\mu$ g/mL in 1mM DTT and WT GDI at 3.5-114 $\mu$ M for the standard curve. For wounding  
498 experiments, all mRNA was injected 20-24hrs before imaging, and purified protein was injected  
499 at least 2hrs before imaging, except for C3 which was injected 30min prior to imaging. For  
500 imaging cortical granule exocytosis, oocytes were injected 16hrs before imaging and matured  
501 ON in progesterone. Two-cell embryos were microinjected with a 5nL injection volume at a final  
502 needle concentration of 167 $\mu$ g/mL for IT-Rho and IT-Cdc42 mRNA, and 18.24 $\mu$ M Cy3-Rho and  
503 Cy3-Cdc42.

504

505 *Purification of recombinant protein from E. coli for antibody purification*

506 BL21 pLysS cells (Thermo Fisher) were transformed with GST-RhoGDI in pGEX6p.1.  
507 A positive clone was used to inoculate 12mL of lysogeny broth (LB) supplemented with  
508 25 $\mu$ g/mL ampicillin and cultured ON. The 12mL culture was added to 1L of LB with ampicillin  
509 and shaken at 37C until OD600~0.6. The culture was induced by adding a final concentration of  
510 0.1mM IPTG and shaken at 37C for 2hrs. BL21 pLysS cells were pelleted at 5300rpm for 10min  
511 at 4C, and the pellet resuspended in Buffer A (50mM Tris-HCL, pH 7.6; 50mM NaCl with 1mM  
512 DTT in PBS). Pellets were stored at -80C. Pellets were thawed at room temperature to promote  
513 cell lysis. Triton X-100 was added to a final concentration of 0.6%, PMSF at 500uM, lysoszyme  
514 at 1mM in 10mM Tris pH 8.0, 400 $\mu$ M Peflabloc, 1 $\mu$ g/mL aprotinin, 1 $\mu$ g/mL leupeptin.  
515 Solubilate was incubated at RT for 30min, DNase1 was added to a final concentration of  
516 10ug/mL, incubated again for at RT for 30min, and centrifuged at 16,000xg for 10min at 4C. The  
517 supernatant was collected and exposed to a column containing glutathione-sepharaose 4B  
518 (MilliporeSigma). The column was washed 5x with Buffer A and the protein eluted with 20mM  
519 Tris, pH 8.0, 20mM glutathione, 400 $\mu$ M Peflabloc, 1.25 $\mu$ g/mL aprotinin, 14.25 $\mu$ g/mL leupeptin,



520 0.25mM E-64, 0.5mM PMSF. Protein concentration was determined by Coomassie stain of a  
521 12% SDS-PAGE alongside a BSA standard curve.

522

### 523 *Antibody generation and purification*

524 FLAG-RhoGDI purified from Sf9 cells was used as an antigen for antibody production in  
525 rabbits (Covance, Princeton, NJ). The serum was heat-inactivated at 56°C for 30min, diluted 1:1  
526 in 20mM Tris, pH 7.5, and filtered through a 0.22µm syringe. The diluted, filtered serum was  
527 loaded onto a column containing GST-GDI coupled to Affi-Gel 15, to minimize antibody cross-  
528 reactivity to the FLAG-tag on the antigen. The column was washed 20x with 20mM Tris, pH 7.5  
529 and 20x with 20mM Tris, pH 7.5, 500mM NaCl. Antibody was first eluted with 100mM glycine,  
530 pH 2.5 into 1M Tris, pH 8.8 for neutralization. The column was washed 20x with 20mM Tris,  
531 pH 8.8. Antibody remaining on the column was eluted with 100mM Triethylamine, pH 11.5 into  
532 concentrated HCl and 1M Tris, pH 7.5 for neutralization. The concentration of each fraction was  
533 determined by A<sub>280</sub>. The peak antibody fractions were pooled, dialyzed against PBS (2x2L) ON,  
534 and concentrated using a 100K MW Amicon Ultra-15 Centrifugal filter (MilliporeSigma).  
535 Antibody specificity was determined by western blotting of purified protein, *X. laevis* oocyte  
536 whole cell lysate (WCL), WCL of oocytes overexpressing GDI and WCL of oocytes expressing  
537 3xGFP-GDI.

538

### 539 *Expression and purification of recombinant protein from insect cells*

540 DH10Bac-competent *E. coli* (Thermo Fisher) were transformed with FLAG-WT RhoGDI  
541 or E158/9Q in pFast-Bac1 and positive clones were identified by blue/white screening. Bacmid

542 was purified and transfected into Sf9 cells using Cellfectin II reagent (Thermo Fisher). High-  
543 expressing clones were identified and baculovirus was generated for two additional passages. Sf9  
544 cells,  $22 \times 10^6$  per 15cm plate, were infected with high-titer baculovirus and incubated  $27^\circ\text{C}$  for  
545 72hrs. Sf9 cells were harvested, centrifuged at  $500 \times g$  for 5min, and pellets were stored at  $-80^\circ\text{C}$ .

546 Frozen pellets were resuspended in a 5x volume of solubilization buffer (1xPBS pH 7.5,  
547 1% Triton X-100,  $0.5 \mu\text{g/mL}$  leupeptin,  $0.5 \mu\text{g/mL}$  aprotinin,  $0.5 \mu\text{g/mL}$  Pepstatin A,  $40 \mu\text{g/mL}$   
548 PMSF,  $100 \mu\text{g/mL}$  benzamidine,  $0.5 \mu\text{g/mL}$  E64) and incubated at  $4^\circ\text{C}$  with end-over-mixing for  
549 1hr. Lysate was clarified by centrifugation at  $21,000 \times g$  for 15min and applied to an anti-FLAG  
550 M2 agarose column bed (MilliporeSigma, Burlington, MA). The column was washed 3x with  
551 wash buffer (1xPBS,  $0.5 \mu\text{g/mL}$  leupeptin,  $0.5 \mu\text{g/mL}$  aprotinin,  $0.5 \mu\text{g/mL}$  Pepstatin A,  $40 \mu\text{g/mL}$   
552 PMSF,  $100 \mu\text{g/mL}$  benzamidine,  $0.5 \mu\text{g/mL}$  E64). A buffer exchange was performed with 1:1  
553 wash buffer:HEPES (25mM HEPES pH 7.5, 100mM KCl), and the column washed 2x with  
554 HEPES. Protein was eluted with 1M Arginine pH 4.4 into an equal volume of collection buffer  
555 (50mM HEPES pH 7.5, 200mM KCl). Fractions were analyzed by coomassie stain of a 12%  
556 SDS-PAGE. Peak fractions were pooled and concentrated using a 10MW Amicon Ultra-15  
557 Centrifugal filter (MilliporeSigma). A buffer exchange was performed during concentrating with  
558 HEPES such that the final Arginine concentration was less than 1mM. Protein purification and  
559 purity was determined by comparison to a BSA standard curve by Coomassie stain of a 12%  
560 SDS-PAGE.

561

562

563

564 *Fixing and staining of wounded oocytes*

565 Oocytes were wounded, allowed to heal for 2-3min and fixed for 2hrs in 10mM EGTA,  
566 100mM KCl, 3mM MgCl<sub>2</sub>, 10mM HEPES, 150mM sucrose (pH 7.6), 4% PFA, 0.1%  
567 glutaraldehyde, 0.1% Triton X-100. Fixed oocytes were washed 5x in TBSN/BSA (5mg/mL  
568 BSA in 1xTBS containing 0.1% NP-40). Oocytes were bisected and blocked in TBSN/BSA for  
569 4hrs at 4°C. Oocytes were stained with rabbit  $\alpha$ -RhoGDI at 1:1000 in TBSN/BSA for 12hrs,  
570 washed 5x in TBSN/BSA over 12hrs, stained with chicken  $\alpha$ -rabbit Alexa Fluor 647 (Invitrogen,  
571 Carlesbad, CA) at 1:10,000 for 12hrs in BSN/BSA at 4°C, and washed 5x in TBSN/BSA over  
572 12hrs.

573

574 *Image acquisition, wounding and data analysis*

575 Laser scanning confocal microscopy was performed using a Nikon Eclipse Ti inverted  
576 microscope with a Prairie Point Scanner confocal system (Bruker, Middleton, WI). The  
577 microscope was fitted with a 440-nm dye laser pumped by a MicroPoint 337-nm nitrogen laser  
578 (Andor, South Windsor, CT) for wounding. Brightest-point projections, measurements of  
579 fluorescence intensities, area and distances were made in FIJI (Schindelin et al., 2012). Bio-  
580 Formats Importer and De-Flicker plugins were used. Ring intensity corrected for background  
581 was calculated by quantifying the mean intensity of the ring and subtracting the mean intensity  
582 of the background. Total activity was calculated by multiplying the mean intensity of the zone  
583 (corrected for background) by the area of the zone, normalized for wound width. GraphPad  
584 Prism was used to plot quantifications and perform statistical analyses. An unpaired student's T-  
585 test with a 2-tailed distribution and unequal variance was used to compare two conditions, one-

586 way ANOVA with a Tukey post hoc analysis was used to analyze more than two conditions.

587 \* $p < 0.05$ , \*\* $p < 0.01$ , \*\*\* $p < 0.001$ , \*\*\*\* $p < 0.0001$ .

588

589 *Supported lipid bilayer assay*

590 Small unilamellar vesicles and supported lipid bilayers were prepared with 100% 1,2-  
591 dioleoyl-sn-glycero-3-phosphocholine (18:1 DOPC; Avanti Polar Lipids, Inc., Alabaster, AL) as  
592 described before (Hansen et al., 2019). 250 $\mu$ L Cy3 labeled GTPases were incubated on SLBs at  
593 200nM final concentration until equilibrium was reached. A 0.5mm silicone tubing was attached  
594 drop-to-drop to the chamber with the equilibrated sample via a male luer connector (ibidi GmbH,  
595 Gräfelfing, Germany). After acquisition of few frames in absence of flow, the chamber was  
596 flushed at 10 $\mu$ L/sec with imaging buffer (20mM HEPES pH 7.0, 150mM KCl, 1.5mM MgCl<sub>2</sub>,  
597 0.5mM EGTA, 100 $\mu$ M GDP/GTP) alone or in presence of a GTPase solubilizer until baseline  
598 was reached. Oxygen scavenger system (1.25mg/mL glucose oxidase, 0.2 mg/mL catalase, 400  
599 mg/mL glucose) was added fresh to each sample and buffer before imaging. TIRF was  
600 performed on a Nikon Eclipse Ti inverted microscope with a VisiScope TIRF-FRAP Cell  
601 Explorer system (Visitron Systems GmbH, Puchheim, Germany) using a 60 $\times$  Apo TIRF oil-  
602 immersion objective (1.49 N.A.). Cy3-labeled proteins were excited with a 561-nm laser line,  
603 excitation light was passed through a ET-561nm Laser Bandpass Set (Chroma Technology  
604 Corporation, Bellows Falls, VT) before illuminating the sample. Fluorescence emission was  
605 detected on a Evolve 512 Delta EMCCD camera (Teledyne Photometrics, Tucson, AZ).  
606 Measurements of fluorescence intensities were made in FIJI (Schindelin et al., 2012). Plot Z-axis  
607 profile tool and Bio-Formats Importer plugins were used. Fluorescence intensity was corrected  
608 for background. To display multiple curves on the same graph, data from different experiments

609 were aligned using the overshoot signal occurring after the flow was started and normalized  
610 dividing by the maximum intensity. Data from wash off experiments were fitted with a one  
611 component exponential decay function ( $y = y_0 + A e^{-\lambda x}$ ;  $y_0$ = y offset,  $A$ =amplitude,  
612  $\lambda$ =exponential decay constant), choosing a fitting range that did not include the initial overshoot.  
613 This was possible because a monoexponential function can be fitted to a range of the data set  
614 without affecting the  $\lambda$  value obtained.  $K_{\text{off}}$  titration curves were fitted with a hyperbolic function  
615 ( $y = y_0 + \frac{\lambda_{\text{max}} x}{K_d + x}$ ). Origin Pro (OriginLab Corporation, Northampton, MA) was used to analyze  
616 data, plot quantifications and perform statistical analyses. An unpaired student's T-test with a 2-  
617 tailed distribution and equal variance was used to compare two conditions. \*\* $p < 0.01$ ,  
618 \*\*\* $p < 0.001$ , \*\*\*\* $p < 0.0001$ .

619

620

621

622

623

624

625

626

627

628

629 **Acknowledgements**

630           This work was supported by National Institutes of Health Grant GM52932 to W.B., a Dr.  
631 Stanley and Dr. Eva Lurie Weinreb Fellowship to A.G. and HSFP CDA00070/2017-2 to P.B. I.V  
632 is supported by the MaxSynBio Consortium, which is jointly funded by the Federal Ministry of  
633 Education and Research of Germany and the Max Planck Society. We acknowledge National  
634 Institutes Health Grant R44 MH065724 to LOCI at UW-Madison. We are also grateful to both  
635 our labs for their continued input.

636

637

638

639

640

641

642

643

644

645

646

647

648 **References**

- 649 Abo, A., Webb, M., Grogan, A., & Segal, A. (1994). Activation of NADPH oxidase involves the  
650 dissociation of p21rac from its inhibitory GDP/GTP exchange protein (rhoGDI) followed  
651 by its translocation to the plasma membrane. *The Biochemical Journal*, 298 Pt 3(3), 585–  
652 591. <https://doi.org/10.1042/bj2980585>
- 653 Abreu-Blanco, M. T., Verboon, J. M., & Parkhurst, S. M. (2014). Coordination of Rho Family  
654 GTPase Activities to Orchestrate Cytoskeleton Responses during Cell Wound Repair.  
655 *Current Biology*, 24(2), 144–155. <https://doi.org/10.1016/j.cub.2013.11.048>
- 656 Bement, W. M., Benink, H. A., & Von Dassow, G. (2005). A microtubule-dependent zone of  
657 active RhoA during cleavage plane specification. *Journal of Cell Biology*, 170(1), 91–101.  
658 <https://doi.org/10.1083/jcb.200501131>
- 659 Bendezú, F. O., Vincenzetti, V., Vavylonis, D., Wyss, R., Vogel, H., & Martin, S. G. (2015).  
660 Spontaneous Cdc42 Polarization Independent of GDI-Mediated Extraction and Actin-Based  
661 Trafficking. *PLoS Biology*, 13(4), 1–30. <https://doi.org/10.1371/journal.pbio.1002097>
- 662 Benink, H. (2005). *Characterization of Rho GTPases during wound healing - Catalog - UW-*  
663 *Madison Libraries*. Retrieved from  
664 <https://search.library.wisc.edu/catalog/9910091280802121>
- 665 Benink, H. A., & Bement, W. M. (2005). Concentric zones of active RhoA and Cdc42 around  
666 single cell wounds. *Journal of Cell Biology*, 168(3), 429–439.  
667 <https://doi.org/10.1083/jcb.200411109>
- 668 Benink, H., & Bement, W. (2001). Concentric rings of Rho and Rac/Cdc42 activity encircle  
669 oocyte wounds - UW Madison. *Molecular Biology of the Cell*, 12, 396A. Retrieved from  
670 [http://uwi-primoalma-](http://uwi-primoalma-prod.hosted.exlibrisgroup.com/primo_library/libweb/action/openurl?sid=google&auinit=H)  
671 [prod.hosted.exlibrisgroup.com/primo\\_library/libweb/action/openurl?sid=google&auinit=H](http://uwi-primoalma-prod.hosted.exlibrisgroup.com/primo_library/libweb/action/openurl?sid=google&auinit=H)  
672 [A&aulast=Benink&atitle=Concentric+rings+of+Rho+and+Rac/Cdc42+activity+encircle+o](http://uwi-primoalma-prod.hosted.exlibrisgroup.com/primo_library/libweb/action/openurl?sid=google&auinit=H)  
673 [ocyte+wounds&ttitle=Molecular+biology+of+the+cell+/&volume=12&date=200](http://uwi-primoalma-prod.hosted.exlibrisgroup.com/primo_library/libweb/action/openurl?sid=google&auinit=H)
- 674 Bishop, A. L., & Hall, A. (2000). *Rho GTPases and their effector proteins*. *Biochem. J* (Vol.  
675 348). Retrieved from  
676 <https://www.ncbi.nlm.nih.gov/pmc/articles/PMC1221060/pdf/10816416.pdf>
- 677 Boulter, E., Garcia-Mata, R., Guilluy, C., Dubash, A., Rossi, G., Brennwald, P. J., & Burridge,  
678 K. (2010). Regulation of Rho GTPase crosstalk, degradation and activity by RhoGDI1.  
679 *Nature Cell Biology*, 12(5), 477–483. <https://doi.org/10.1038/ncb2049>
- 680 Burkel, B. M., Benink, H. A., Vaughan, E. M., von Dassow, G., & Bement, W. M. (2012). A  
681 Rho GTPase Signal Treadmill Backs a Contractile Array. *Developmental Cell*, 23(2), 384–  
682 396. <https://doi.org/10.1016/j.devcel.2012.05.025>
- 683 Clark, A. G., Miller, A. L., Vaughan, E., Yu, H. Y. E., Penkert, R., & Bement, W. M. (2009).  
684 Integration of Single and Multicellular Wound Responses. *Current Biology*, 19(16), 1389–  
685 1395. <https://doi.org/10.1016/j.cub.2009.06.044>
- 686 Davenport, N. R. (2016). *Molecular and Cellular Determinants of Pattern Formation During*

- 687        *Wound Repair in Xenopus laevis*. University of Wisconsin-Madison.
- 688        Davenport, N. R., Sonnemann, K. J., Eliceiri, K. W., & Bement, W. M. (2016). Membrane  
689        dynamics during cellular wound repair. *Molecular Biology of the Cell*, 27(14), 2272–2285.  
690        <https://doi.org/10.1091/mbc.E16-04-0223>
- 691        Dransart, E., Morin, A., Cherfils, J., & Olofsson, B. (2005). Uncoupling of inhibitory and  
692        shuttling functions of Rho GDP dissociation inhibitors. *Journal of Biological Chemistry*,  
693        280(6), 4674–4683. <https://doi.org/10.1074/jbc.M409741200>
- 694        Garcia-Mata, R., Boulter, E., & Burridge, K. (2011). The “invisible hand”: regulation of RHO  
695        GTPases by RHOGDIs. *Nature Reviews Molecular Cell Biology*, 12(8), 493–504.  
696        <https://doi.org/10.1038/nrm3153>
- 697        Gavriljuk, K., Itzen, A., Goody, R. S., Gerwert, K., & Köttling, C. (2013). Membrane extraction  
698        of Rab proteins by GDP dissociation inhibitor characterized using attenuated total reflection  
699        infrared spectroscopy. *Proceedings of the National Academy of Sciences of the United*  
700        *States of America*, 110(33), 13380–13385. <https://doi.org/10.1073/pnas.1307655110>
- 701        Gibson, D. G., Young, L., Chuang, R.-Y., Venter, J. C., Hutchison, C. A., & Smith, H. O.  
702        (2009). Enzymatic assembly of DNA molecules up to several hundred kilobases. *Nature*  
703        *Methods*, 6(5), 343–345. <https://doi.org/10.1038/nmeth.1318>
- 704        Hancock, J. F., & Hall, A. (1993). A novel role for RhoGDI as an inhibitor of GAP proteins. *The*  
705        *EMBO Journal*, 1(1), 91–95.
- 706        Hansen, S. D., Huang, W. Y. C., Lee, Y. K., Bieling, P., Christensen, S. M., & Groves, J. T.  
707        (2019). Stochastic geometry sensing and polarization in a lipid kinase-phosphatase  
708        competitive reaction. *Proceedings of the National Academy of Sciences of the United States*  
709        *of America*, 201901744. <https://doi.org/10.1073/pnas.1901744116>
- 710        Hart, M. J., Maru, Y., Leonard, D., Witte, O. N., Evans, T., & Cerione, R. A. (1992). A GDP  
711        dissociation inhibitor that serves as a GTPase inhibitor for the Ras-like protein CDC42Hs.  
712        *Science*, 258(5083), 812–815. <https://doi.org/10.1126/science.1439791>
- 713        Hodgson, L., Spiering, D., Sabouri-Ghomi, M., Dagliyan, O., DerMardirossian, C., Danuser, G.,  
714        & Hahn, K. M. (2016). FRET binding antenna reports spatiotemporal dynamics of GDI-  
715        Cdc42 GTPase interactions. *Nature Chemical Biology*, 12(10), 802–809.  
716        <https://doi.org/10.1038/nchembio.2145>
- 717        Hoffman, G. R., Nassar, N., & Cerione, R. A. (2000). Structure of the Rho family GTP-binding  
718        protein Cdc42 in complex with the multifunctional regulator RhoGDI. *Cell*, 100(3), 345–  
719        356. [https://doi.org/10.1016/S0092-8674\(00\)80670-4](https://doi.org/10.1016/S0092-8674(00)80670-4)
- 720        Howell, A. S., Jin, M., Wu, C.-F., Zyla, T. R., Elston, T. C., & Lew, D. J. (2012). Negative  
721        feedback enhances robustness in the yeast polarity establishment circuit. *Cell*, 149(2), 322–  
722        333. <https://doi.org/10.1016/j.cell.2012.03.012>
- 723        Johnson, J. L., Erickson, J. W., & Cerione, R. A. (2009). New Insights into How the Rho  
724        Guanine Nucleotide Dissociation Inhibitor Regulates the Interaction of Cdc42 with  
725        Membranes. *Journal of Biological Chemistry*, 284(35), 23860–23871.  
726        <https://doi.org/10.1074/jbc.M109.031815>



- 727 Kimura, K., Ito, M., Amano, M., Chihara, K., Fukata, Y., Nakafuku, M., ... Kaibuchi, K. (1996).  
728 Regulation of myosin phosphatase by Rho and Rho-associated kinase (Rho-kinase). *Science*  
729 (*New York, N.Y.*), 273(5272), 245–248. <https://doi.org/10.1126/SCIENCE.273.5272.245>
- 730 Machacek, M., Hodgson, L., Welch, C., Elliott, H., Pertz, O., Nalbant, P., ... Danuser, G. (2009).  
731 Coordination of Rho GTPase activities during cell protrusion. *Nature*, 461(7260), 99–103.  
732 <https://doi.org/10.1038/nature08242>
- 733 Martin, K., Reimann, A., Fritz, R. D., Ryu, H., Jeon, N. L., & Pertz, O. (2016). Spatio-temporal  
734 co-ordination of RhoA, Rac1 and Cdc42 activation during prototypical edge protrusion and  
735 retraction dynamics. *Scientific Reports*, 6(1), 21901. <https://doi.org/10.1038/srep21901>
- 736 Moon, S. Y., & Zheng, Y. (2003). Rho GTPase-activating proteins in cell regulation. *Trends in*  
737 *Cell Biology*, 13(1), 13–22. [https://doi.org/10.1016/S0962-8924\(02\)00004-1](https://doi.org/10.1016/S0962-8924(02)00004-1)
- 738 Ngo, A. T. P., Thierheimer, M. L. D., Babur, Ö., Rocheleau, A. D., Huang, T., Pang, J., ...  
739 Aslan, J. E. (2017). Assessment of roles for the Rho-specific guanine nucleotide  
740 dissociation inhibitor Ly-GDI in platelet function: a spatial systems approach. *American*  
741 *Journal of Physiology - Cell Physiology*, 312(4), C527–C536.  
742 <https://doi.org/10.1152/ajpcell.00274.2016>
- 743 Nomanbhoy, T., Erickson, J., & Cerione, R. (1999). Kinetics of Cdc42 Membrane Extraction by  
744 Rho-GDI Monitored by Real-Time Fluorescence Resonance Energy Transfer. *Biochemistry*,  
745 38(6), 1744–1750. <https://doi.org/10.1021/BI982198U>
- 746 Nomanbhoy, T. K., & Cerione, R. A. (1996). *Characterization of the Interaction between*  
747 *RhoGDI and Cdc42Hs Using Fluorescence Spectroscopy\**. Retrieved from  
748 <http://www.jbc.org/>
- 749 Palamidessi, A., Frittoli, E., Garré, M., Faretta, M., Mione, M., Testa, I., ... Di Fiore, P. P.  
750 (2008). Endocytic Trafficking of Rac Is Required for the Spatial Restriction of Signaling in  
751 Cell Migration. *Cell*, 134(1), 135–147. <https://doi.org/10.1016/J.CELL.2008.05.034>
- 752 Popp, M. W., Antos, J. M., Grotenbreg, G. M., Spooner, E., & Ploegh, H. L. (2007). Sortagging:  
753 a versatile method for protein labeling. *Nature Chemical Biology*, 3(11), 707–708.  
754 <https://doi.org/10.1038/nchembio.2007.31>
- 755 Rossman, K., Der, C., & Sondek, J. (2005). GEF means go: turning on RHO GTPases with  
756 guanine nucleotide-exchange factors. <https://doi.org/10.1038/nrm1587>
- 757 Schindelin, J., Arganda-Carreras, I., Frise, E., Kaynig, V., Longair, M., Pietzsch, T., ... Cardona,  
758 A. (2012). Fiji: an open-source platform for biological-image analysis. *Nature Methods*,  
759 9(7), 676–682. <https://doi.org/10.1038/nmeth.2019>
- 760 Sekine, A., Fujiwara, M., & Narumiyas, S. (1989). Asparagine Residue in the rho Gene Product  
761 Is the Modification Site for Botulinum ADP-ribosyltransferase. *The Journal of Biological*  
762 *Chemistry*, 264(15), 8602–8605. Retrieved from  
763 <http://www.jbc.org/content/264/15/8602.full.pdf>
- 764 Slaughter, B. D., Das, A., Schwartz, J. W., Rubinstein, B., & Li, R. (2009). Dual Modes of  
765 Cdc42 Recycling Fine-Tune Polarized Morphogenesis. *Developmental Cell*, 17(6), 823–  
766 835. <https://doi.org/10.1016/J.DEVCEL.2009.10.022>

- 767 Smith, M. J., Neel, B. G., & Ikura, M. (2013). NMR-based functional profiling of RASopathies  
768 and oncogenic RAS mutations. *Proceedings of the National Academy of Sciences*, *110*(12),  
769 4574–4579. <https://doi.org/10.1073/pnas.1218173110>
- 770 Sokac, A. M., Co, C., Taunton, J., & Bement, W. (2003). Cdc42-dependent actin polymerization  
771 during compensatory endocytosis in *Xenopus* eggs. *Nature Cell Biology*, *5*(8), 727–732.  
772 <https://doi.org/10.1038/ncb1025>
- 773 Tnimov, Z., Guo, Z., Gambin, Y., Nguyen, U. T. T. T., Wu, Y.-W. W., Abankwa, D., ...  
774 Alexandrov, K. (2012). Quantitative analysis of prenylated RhoA interaction with its  
775 chaperone, RhoGDI. *Journal of Biological Chemistry*, *287*(32), 26549–26562.  
776 <https://doi.org/10.1074/jbc.M112.371294>
- 777 Ueda, T., Kikuchi, A., Ohga, N., Yamamoto, J., & Takai, Y. (2001). Purification and  
778 Characterization from Bovine Brain Cytosol of a Novel Regulatory Protein Inhibiting the  
779 Dissociation of GDP from and the Subsequent Binding of GTP to rhoB ~20, a ras p21like  
780 GTP- binding Protein\*. *The Journal of Biological Chemistry*, *265*(16), 1–9. Retrieved from  
781 [http://www.jbc.org/content/265/16/9373.full.pdf%0Apapers3://publication/uuid/E9334306-](http://www.jbc.org/content/265/16/9373.full.pdf%0Apapers3://publication/uuid/E9334306-D989-40B8-A264-39306D63F2D4)  
782 [D989-40B8-A264-39306D63F2D4](http://www.jbc.org/content/265/16/9373.full.pdf%0Apapers3://publication/uuid/E9334306-D989-40B8-A264-39306D63F2D4)
- 783 Ueyama, T., Son, J., Kobayashi, T., Hamada, T., Nakamura, T., Sakaguchi, H., ... Saito, N.  
784 (2013). Negative Charges in the Flexible N-Terminal Domain of Rho GDP-Dissociation  
785 Inhibitors (RhoGDIs) Regulate the Targeting of the RhoGDI-Rac1 Complex to Membranes.  
786 *The Journal of Immunology*, *191*(5), 2560–2569. <https://doi.org/10.4049/jimmunol.1300209>
- 787 Vaughan, E. M., Miller, A. L., Yu, H. Y. E., & Bement, W. M. (2011). Control of local Rho  
788 GTPase crosstalk by Abr. *Current Biology*, *21*(4), 270–277.  
789 <https://doi.org/10.1016/j.cub.2011.01.014>
- 790 Wühr, M., Freeman, R. M., Presler, M., Horb, M. E., Peshkin, L., Gygi, S. P., & Kirschner, M.  
791 W. (2014). Deep Proteomics of the *Xenopus laevis* Egg using an mRNA-Derived Reference  
792 Database. *Current Biology*, *24*(13), 1467–1475. <https://doi.org/10.1016/J.CUB.2014.05.044>
- 793 Yonemura, S., Hirao-Minakuchi, K., & Nishimura, Y. (2004). Rho localization in cells and  
794 tissues. *Experimental Cell Research*, *295*(2), 300–314.  
795 <https://doi.org/10.1016/J.YEXCR.2004.01.005>
- 796 Yu, H. Y. E., & Bement, W. M. (2007). Control of local actin assembly by membrane fusion-  
797 dependent compartment mixing. *Nature Cell Biology*, *9*(2), 149–159.  
798 <https://doi.org/10.1038/ncb1527>
- 799 Yüce, Ö., Piekny, A., & Glotzer, M. (2005). An ECT2-centralspindlin complex regulates the  
800 localization and function of RhoA. *The Journal of Cell Biology*, *170*(4), 571–582.  
801 <https://doi.org/10.1083/jcb.200501097>
- 802 Zhang, S.-C., Gremer, L., Heise, H., Janning, P., Shymanets, A., Cirstea, I. C., ... Ahmadian, M.  
803 R. (2014). Liposome Reconstitution and Modulation of Recombinant Prenylated Human  
804 Rac1 by GEFs, GDI1 and Pak1. *PLoS ONE*, *9*(7), e102425.  
805 <https://doi.org/10.1371/journal.pone.0102425>

807 **Figure 1: Direct visualization of Rho and Cdc42 during cell wound repair.** A) Left: image of  
808 active Cdc42 (magenta) and active Rho (green) around a single-cell wound; right: schematic  
809 diagram indicating zone regions; B) Wound in oocyte microinjected with rGBD (magenta) and  
810 IT-Rho (green); B') Line scan of normalized fluorescence intensity from (B); C) As in B but  
811 with wGBD (magenta) and IT-Cdc42 (green); D,D') As in B but with Cy3-Rho (magenta) and  
812 rGBD (green); E,E') As in B but with Cy3-Cdc42 (magenta) and wGBD (green); F,F') As in B  
813 but with Cy3-Rho (magenta) and IT-Rho (green); G,G') As in B but with Cy3-Cdc42 (magenta)  
814 and IT-Cdc42 (green) and line scan. Scale bar 10 $\mu$ m, time min:sec.

815

816 **Figure 2: Directly-labeled Rho and Cdc42 during cytokinesis, cortical granule exocytosis,**  
817 **epithelial wound repair and at junctions.** A) Cytokinesis in *X. laevis* embryo microinjected  
818 with IT-Rho; IT-Rho accumulates at nascent cleavage furrow (arrowhead); B) Cytokinesis in *X.*  
819 *laevis* embryo microinjected with Cy3-Rho; Cy3-Rho accumulates at nascent cleavage furrow  
820 (arrowhead); C) *X. laevis* embryo microinjected with IT-Rho (left) and Cy3-Rho (right); both are  
821 enriched at cell-cell junctions; D) Meiotically mature *Xenopus* egg microinjected with IT-Cdc42;  
822 IT-Cdc42 is recruited to exocytosing cortical granules (arrowheads) following egg activation  
823 (0:42); E) *X. laevis* embryo microinjected with IT-Cdc42; IT-Cdc42 concentrates at cell-cell  
824 junctions (arrowhead; 0:00) and, following damage, is recruited to the wound and becomes  
825 enriched at junctions (arrow); F) C3-insensitive IT-Rho rescues Rho activation in presence of  
826 C3. Control: cell microinjected with rGBD shows normal Rho activity accumulation and wound  
827 closure; C3: cell microinjected with rGBD fails to activate Rho in presence of C3; IT-Rho-  
828 N41V: cell microinjected with rGBD and C3-insensitive IT-Rho normally activates Rho; IT-  
829 Rho-N41V+C3: cell microinjected with rGBD and C3-insensitive IT-Rho rescues Rho activity in

830 presence of C3. Scale bar 10 $\mu$ m, time min:sec. G) Quantification of Rho activity, corrected for  
831 background (n=8-12). One-way ANOVA with Tukey post-test statistical analysis. \*p<0.05,  
832 \*\*\*p<0.001, \*\*\*\*p<0.0001.

833

834 **Figure 3: Pools of inactive and active Cdc42 at the plasma membrane.** A) Oocytes  
835 microinjected with wGBD (green), Cy3-Cdc42 (magenta) and indicated concentrations of  
836 mRNA encoding the Cdc42-GAP Abr. Scale bar 10 $\mu$ m, time min:sec.; B) Quantification of Cy3-  
837 Cdc42, active Cdc42 and ratio of active Cdc42 to Cy3-Cdc42 for each condition. n=8-24. One-  
838 way ANOVA with Tukey post-test statistical analysis. \*p<0.05, \*\*p<0.01, \*\*\*p<0.001,  
839 \*\*\*p<0.0001.

840

841 **Figure 4: RhoGDI is recruited to single-cell wounds enriched in Rho and Cdc42 activity.** A)  
842 Oocytes microinjected with wGBD (magenta), rGBD (blue) and GDI (green); B) Wounded  
843 oocytes fixed and stained with anti-*X. laevis* RhoGDI. Scale bar 10 $\mu$ m, time min:sec.

844

845 **Figure 5: RhoGDI overexpression differentially regulates Rho and Cdc42 activity.** A) Top 2  
846 rows: oocytes microinjected with Cy3-Cdc42 (magenta) and wGBD (green) alone or with  
847 RhoGDI. Bottom 2 rows: Oocytes microinjected with Cy3-Rho (magenta) and rGBD (green)  
848 alone or with GDI; B) Oocytes microinjected with wGBD (magenta), rGBD (green) and  
849 increasing concentrations of RhoGDI protein; C) Standard curve of decrease in Rho and Cdc42  
850 activity with increasing concentrations of RhoGDI (n=10-23 for each concentration). Scale bar  
851 10 $\mu$ m, time min:sec.

852 **Figure 6: RhoGDI actively extracts RhoGTPases from membranes *in vitro*.** A) Experimental  
853 setup of *in vitro* experiments: prenylated RhoGTPases were reconstituted on supported lipid  
854 bilayers (SLBs) in flow chambers and imaged by TIRF. Wash off experiments were designed to  
855 avoid RhoGTPase rebinding to membranes and performed controlling the flow rate via a syringe  
856 pump; B) TIRF imaging allows for selective imaging of RhoGTPases at the membrane.  
857 Prenylated and unprenylated Cdc42 were imaged in the same conditions and TIRF signal at  
858 membranes was quantified (n=4 for each condition); C) Wash off experiments: prenylated Cdc42  
859 reconstituted on SLBs were washed with imaging buffer only (control), in presence of 5 $\mu$ M  
860 RhoGDI or RabGTTase Beta. Time lapse images at selected time points and quantification of the  
861 full experiments are shown. Decay curves were fitted with a monoexponential function; D)  
862 Comparison of the  $K_{off}$  values obtained by fitting the decay curves (n=3 for control and  
863 RabGTTase Beta, n=2 for RhoGDI); E) Schematic representation of the proposed mode of action  
864 of the two RhoGTPases solubilizers. RabGGTase Beta sequesters RhoGTPases in solution,  
865 whereas RhoGDI actively extracts RhoGTPases from the membranes. Scale bar 10 $\mu$ m. Unpaired  
866 student's t-test, 2-tailed distribution, equal variance statistical analysis. \*\*p<0.01, \*\*\*p<0.001,  
867 \*\*\*\*p<0.0001.

868

869 **Figure 7: RhoGDI actively extracts both inactive and active RhoGTPases from membranes**  
870 ***in vitro*.** A) Wash off experiments: prenylated Cdc42 in both inactive (Cdc42:GDP) and  
871 constitutively active (Cdc42Q61L:GTP) states were reconstituted on SLBs and washed in  
872 presence of 5  $\mu$ M RhoGDI. Time lapse images at selected time points are shown; B)  
873 Quantification of wash off experiments in which the concentration of RhoGDI was titrated  
874 between 0 and 20 $\mu$ M; C)  $K_{off}$  values obtained for inactive and constitutively active Cdc42Q61L

875 fitting the decay curves with a monoexponential decay function are plotted against RhoGDI  
876 concentration. Extraction rates were fitted with a hyperbolic function; D) Ratio of  $K_{off}$  obtained  
877 for inactive and constitutively active Cdc42Q61L at the same RhoGDI concentration; F) Same as  
878 in C-D for inactive (RhoA:GDP) and constitutively active (RhoAQ63L:GTP) RhoA. Scale bar  
879 10 $\mu$ m.

880

881 **Figure 8: Identification of mutant RhoGDI deficient in extraction of active RhoGTPase.** A)

882 Oocytes microinjected with halo-tagged WT,  $\Delta$ 51-199, E158/9A and E158/9Q GDI mutants.

883 Scale bar 10 $\mu$ m, time min:sec; B) Quantification of RhoGDI intensity at wounds (n=7-13).

884 Unpaired student's t-test, 2-tailed distribution, unequal variance statistical analysis to WT.

885 \*\*\*\*p<0.0001. C) Comparison of  $K_{off}$  values obtained for inactive (Cdc42:GDP, RhoA:GDP)

886 and constitutively-active (Cdc42Q61L:GTP, Cdc42Q63L:GTP) Cdc42 and RhoA from wash off

887 experiments in presence of either WT (black) or E158/9Q (QQ) (red) RhoGDI. Extraction rates

888 were fitted with a hyperbolic function.

889

890 **Figure 9: RhoGDI extracts active Cdc42 *in vivo*.** A) Oocytes microinjected with wGBD alone

891 or with constitutively-active Cdc42 (G12V), WT or QQ GDI; B) Quantification of total Cdc42

892 activity for (A), (n=12); C) oocytes microinjected with Cy3-Cdc42 bound to GTP $\gamma$ S alone or

893 with WT or QQ GDI; D) Quantification of intensity for (C), (n=18). Scale bar 10 $\mu$ m, time

894 min:sec. One-way ANOVA with Tukey post-test statistical analysis; E) Oocytes microinjected

895 with wGBD (magenta), rGBD (green) alone or with QQ GDI; F) Quantification of total Cdc42

896 (magenta) and Rho (green) activity from (E) (n=9); G) Cy3-Cdc42 or Cy3-Rho alone or with QQ

897 GDI; H) Quantification of total recruitment of Cy3-Cdc42 (magenta) and Cy3-Rho (green) (n=6-  
898 11). Scale bar 10 $\mu$ m, time min:sec. Unpaired student's t-test, 2-tailed distribution, unequal  
899 variance statistical analysis. \*p<0.05, \*\*p<0.01, \*\*\*p<0.001, \*\*\*\*p<0.0001.

900

901 **Figure 10: Schematic of proposed update to RhoGTPase cycle.** We propose that in addition  
902 to the canonical GTPase cycle, GDI can extract active GTPase from the plasma membrane.  
903 Based on evidence that GTPase:GDI binding prevents GTP hydrolysis and nucleotide exchange  
904 (Hart et al., 1992; Ueda et al., 2001), active GTPase extracted by GDI would still be active upon  
905 its release back into the plasma membrane.

906

907 **Supplemental Figure 1: Amino-terminally tagged RhoGTPases do not localize properly to**  
908 **wounds.** Oocytes injected with A) mCh-Cdc42 (magenta) and wGBD (green), B) mCh-Rho  
909 (magenta) and rGBD (green) or C) mCh-Rac (magenta) and wGBD (green) with A'-C')  
910 Corresponding line scans. Scale bar 10 $\mu$ m, time min:sec.

911

912 **Supplemental Figure 2: Internally-tagged Rac localizes to wounds.** A) Oocyte injected with  
913 wGBD (magenta) and IT-Rac (green); A') Corresponding line scan. Scale bar 10 $\mu$ m, time  
914 min:sec.

915

916 **Supplemental Figure 3: *X. laevis* RhoGDI antibody specificity and purified RhoGDI**  
917 **protein.** A) Western blot stained with  $\alpha$ GDI antibody to determine specificity; lane 1: *X. laevis*

918 oocyte whole cell lysate (WCL), lane 2: WCL of oocytes overexpressing GDI, lane 3: WCL of  
919 oocytes expressing 3xGFP-RhoGDI, lane 4: purified FLAG-RhoGDI; B) Coomassie stain of  
920 12% SDS-PAGE to assess purity of FLAG-RhoGDI; lane 1: start, lane 2: void, lanes 3-10:  
921 elution fractions. C) Coomassie stain of 12% SDS-PAGE to assess purity of RhoGDI purified  
922 from bacteria; lane 1: start, lane 2: flow through, lane 3: TEV cleavage, lane 4: tag removal, lane  
923 5: end product after gel filtration.

924

925 **Supplemental Figure 4: Bovine RhoGDI decreases Rho and Cdc42 activity in a dose-**  
926 **dependent manner *in vivo*.** Standard curve of decrease in Rho and Cdc42 activity with  
927 increasing concentrations of bovine RhoGDI (n=2-30 for each concentration).

928

929 **Supplemental Figure 5: *In vitro* data analysis.** A) Raw data. Wash off experiments were  
930 started after the RhoGTPase signal at the membrane was stable. After starting the syringe pump,  
931 a signal overshoot occurred; B) The overshoot signal was used as a reference point to align  
932 different experiments and cut off for further analysis; C) Data were background corrected and  
933 normalized to display multiple curve on the same graph; D) Data were fitted with a  
934 monoexponential decay curve to obtain dissociation constants ( $K_{off}$ ) of the GTPases from the  
935 membrane.

936

937 **Supplemental Figure 6: Comparison of bovine and *Xenopus* RhoGDI in their ability to**  
938 **actively extract both inactive and active RhoGTPases from synthetic membranes.** A)  $K_{off}$   
939 values obtained for inactive and constitutively active Cdc42 at different bovine RhoGDI



940 concentrations. Extraction rates were fitted with a hyperbolic function; A') Ratio of  $K_{off}$  obtained  
941 for inactive and constitutively active Cdc42 at the same bovine RhoGDI concentration; B-B')  
942 same as in A-A' for inactive (RhoA:GDP) and constitutively active (RhoAQ63L:GTP) RhoA.

943

944 **Supplemental Figure 7: Analysis of previously-described extraction-deficient mutants. A-I)**

945 Oocytes microinjected with WT or mutant RhoGDI and quantification of localization relative to  
946 WT RhoGDI; Unpaired student's t-test, 2-tailed distribution, unequal variance statistical  
947 analysis; J) Average  $K_{off}$  values obtained for inactive RhoA and Cdc42 in absence (control) and  
948 presence of 5  $\mu$ M of either bovine RhoGDI WT or bovine RhoGDI mutants.

949

950 **Supplemental Figure 8: Mutant E163/4Q bovine RhoGDI is deficient in extraction of active**

951 **Cdc42 and RhoA *in vitro*.** Comparison of  $K_{off}$  values obtained for inactive (Cdc42:GDP,  
952 RhoA:GDP) and constitutively-active (Cdc42Q61L:GTP, Cdc42Q63L:GTP) Cdc42 and RhoA  
953 from wash off experiments in presence of either WT (black) or E163/4Q (QQ) (red) bovine  
954 RhoGDI. Extraction rates were fitted with a hyperbolic function.

955

956 **Supplemental Figure 9: Schematic of RhoGDI's role in RhoGTPase zone definition around**

957 **wounds.** Active Rho (green) and active Cdc42 (red) are activated in discrete, concentric zones  
958 that close inward as the wound heals. Cdc42 inactivation is variable throughout its zone, thus its  
959 zone is shaped by activation (Burkel et al., 2012). Conversely, the Rho zone is shaped by  
960 inactivation as it is subject to RhoGAPs 1/8 at the trailing edge of its zone (Davenport, 2016).

961 Thus, we hypothesize that GDI extracts active Cdc42 throughout the Cdc42 zone and inactive  
962 Rho from the trailing edge of the Rho zone.

963

964 **Supplemental Figure 10: Comparison between G12V and Q61L constitutively-active**

965 **RhoGTPases.**  $K_{off}$  values obtained for constitutively-active Cdc42 G12V fitting the decay

966 curves with a biexponential decay function are plotted against RhoGDI concentration. The fast

967 rate (black) corresponds to the GDP-bound state (dotted black line), the slow rate (red) to the

968 active GTP-state as inferred from the Q61L mutant (dotted red line).

969

970 **Supplemental Figure 11: Cdc42 Q61L does not behave like constitutively-active Cdc42 *in***

971 ***vivo*.** Oocytes injected with wGBD alone or with Cdc42 Q61L. Scale bar 10 $\mu$ m, time min:sec.

972

973

974

975

976

977

978

979

980

## 981 **Supplemental Discussion**

982           Two naturally occurring, oncogenic mutations originally discovered in Ras (Q61L and  
983 G12V) are commonly used as constitutively-active variants of Ras-like GTPases such as Cdc42  
984 and RhoA. While often used interchangeably, it is important to note that the biochemical  
985 properties of these two single site mutations are not equivalent (Smith, Neel, & Ikura, 2013). The  
986 Q61L substitution directly affects a catalytic residue within the RhoGTPase active site and  
987 therefore directly and strongly impairs spontaneous nucleotide hydrolysis. This leads to the  
988 Q61L mutant being dominantly GTP-bound in the absence of external regulators such as GEFs  
989 and GAPs. In other words, GTPases affected by the Q61L substitution do not require GEF  
990 activity to adopt an active, GTP-bound state.

991           The G12V mutation, on the other hand, targets an auxiliary site important for GAP-  
992 mediated hydrolysis. GTPases affected by the G12V mutation are still capable of hydrolyzing  
993 GTP intrinsically and can thus accumulate in the inactive, GDP-bound state in the absence of  
994 external regulators. Their “constitutive activity” rather originates from a complete deficiency in  
995 inactivation via GAP-induced GTP hydrolysis. In line with this, we found that these two  
996 mutants, when purified recombinantly, accumulate in different nucleotide states as determined  
997 by HPLC analysis: Q61L mutant proteins were GTP-bound, whereas G12V ones were GDP  
998 bound after purification. We also found that the two produced different effects *in vivo* with  
999 G12V behaving as expected for a constitutively-active (ie its expression resulted in an excess of  
1000 Cdc42 activity around the wound) while Q61L does not (ie its expression modestly or  
1001 significantly reduced Cdc42 activity around wounds; SuppFig11).

1002           With respect to the results obtained with these mutants *in vitro*, Q61L mutant GTPases  
1003 (constitutively bound to GTP) showed monophasic membrane dissociation kinetics upon

1004 addition of GDI with rates that were clearly slower than those obtained for inactive GTPases  
1005 (Fig7). This shows that the Q61L mutant uniformly adopts an active, GTP-like state distinct from  
1006 the GDP form.

1007           Since the G12V mutant was bound to GDP after purification, we first exchanged its  
1008 nucleotide to GTP $\gamma$ S. GTPases prepared in this manner were however extracted by RhoGDI with  
1009 biphasic kinetics with two characteristic rates, indicating the presence of two biochemically  
1010 distinct GTPase species. Interestingly, the fast rate corresponded to the GDP-bound state,  
1011 whereas the slow rate was nearly identical to the active GTP-state as inferred from the Q61L  
1012 mutant (SuppFig10). From these observations, we drew the following conclusions: i) the G12V  
1013 mutant likely hydrolyzes a considerable fraction of their associated GTP $\gamma$ S during the long time  
1014 needed to prepare our extraction assays (often multiple hours, see Methods), ii) the “active  
1015 states” adopted by Q61L (GTP, complete) and G12V (GTP $\gamma$ S, partial) are identical concerning  
1016 GDI-mediated extraction from membranes. Because of these two reasons combined, we chose to  
1017 work with the Q61L mutants as a proxy for the active GTPase state for all our *in vitro* extraction  
1018 assays.

1019

1020

1021

1022

1023

1024

1025 **Figure 1**

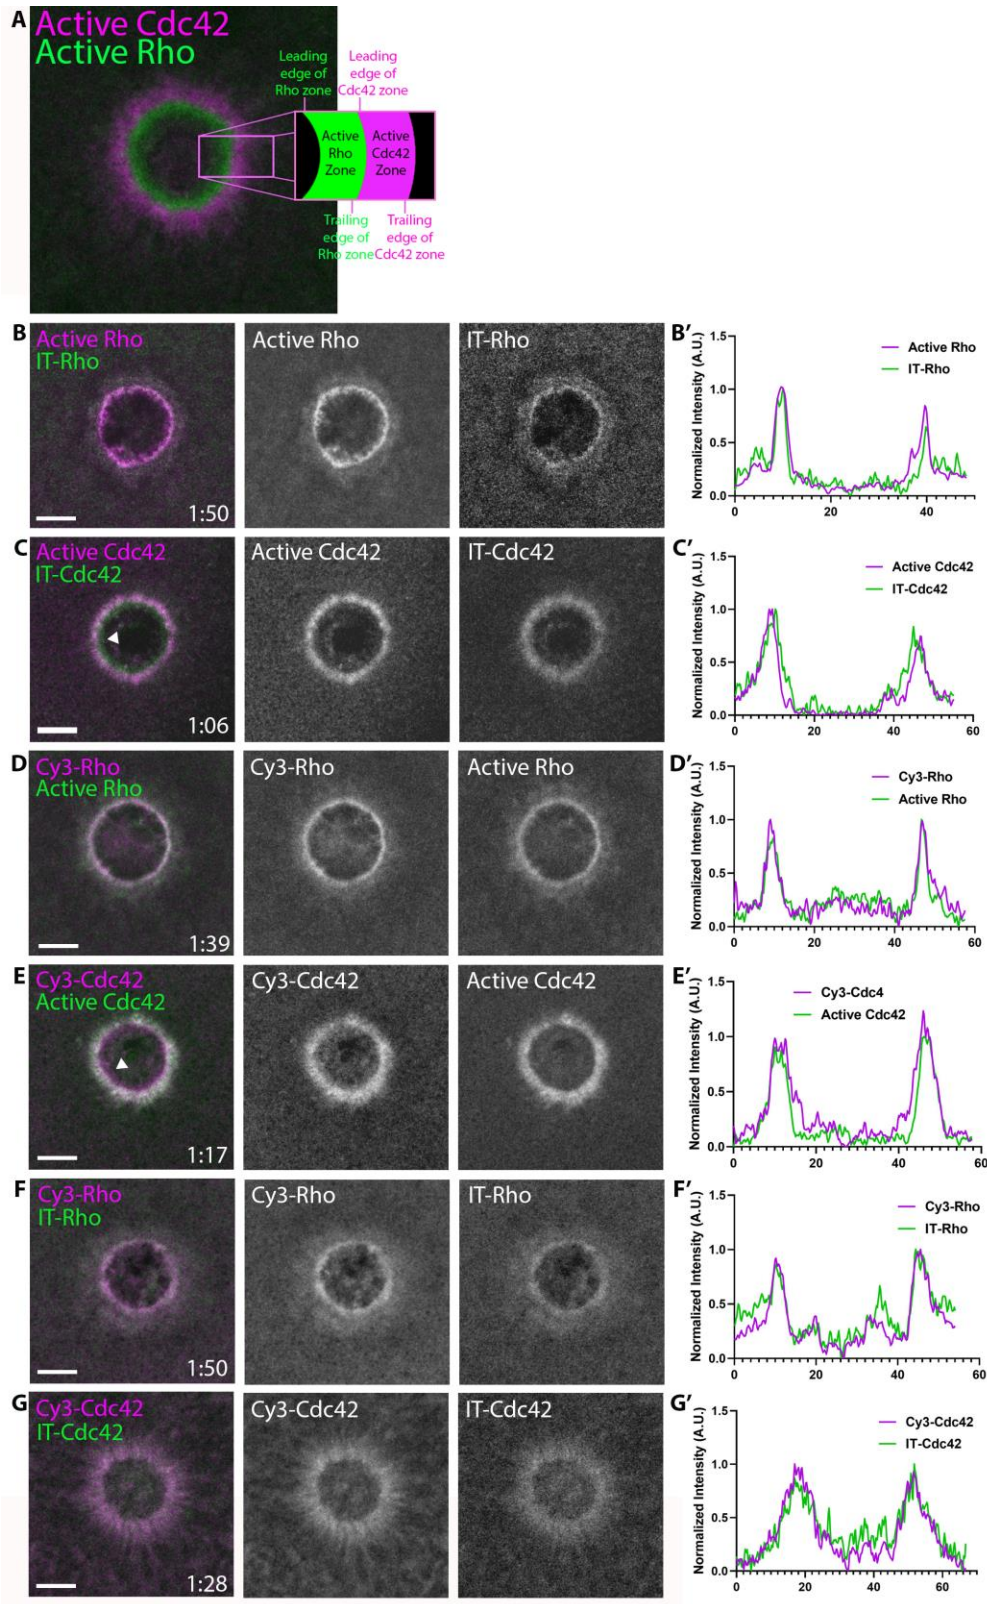

1026

1027

1028 **Figure 2**

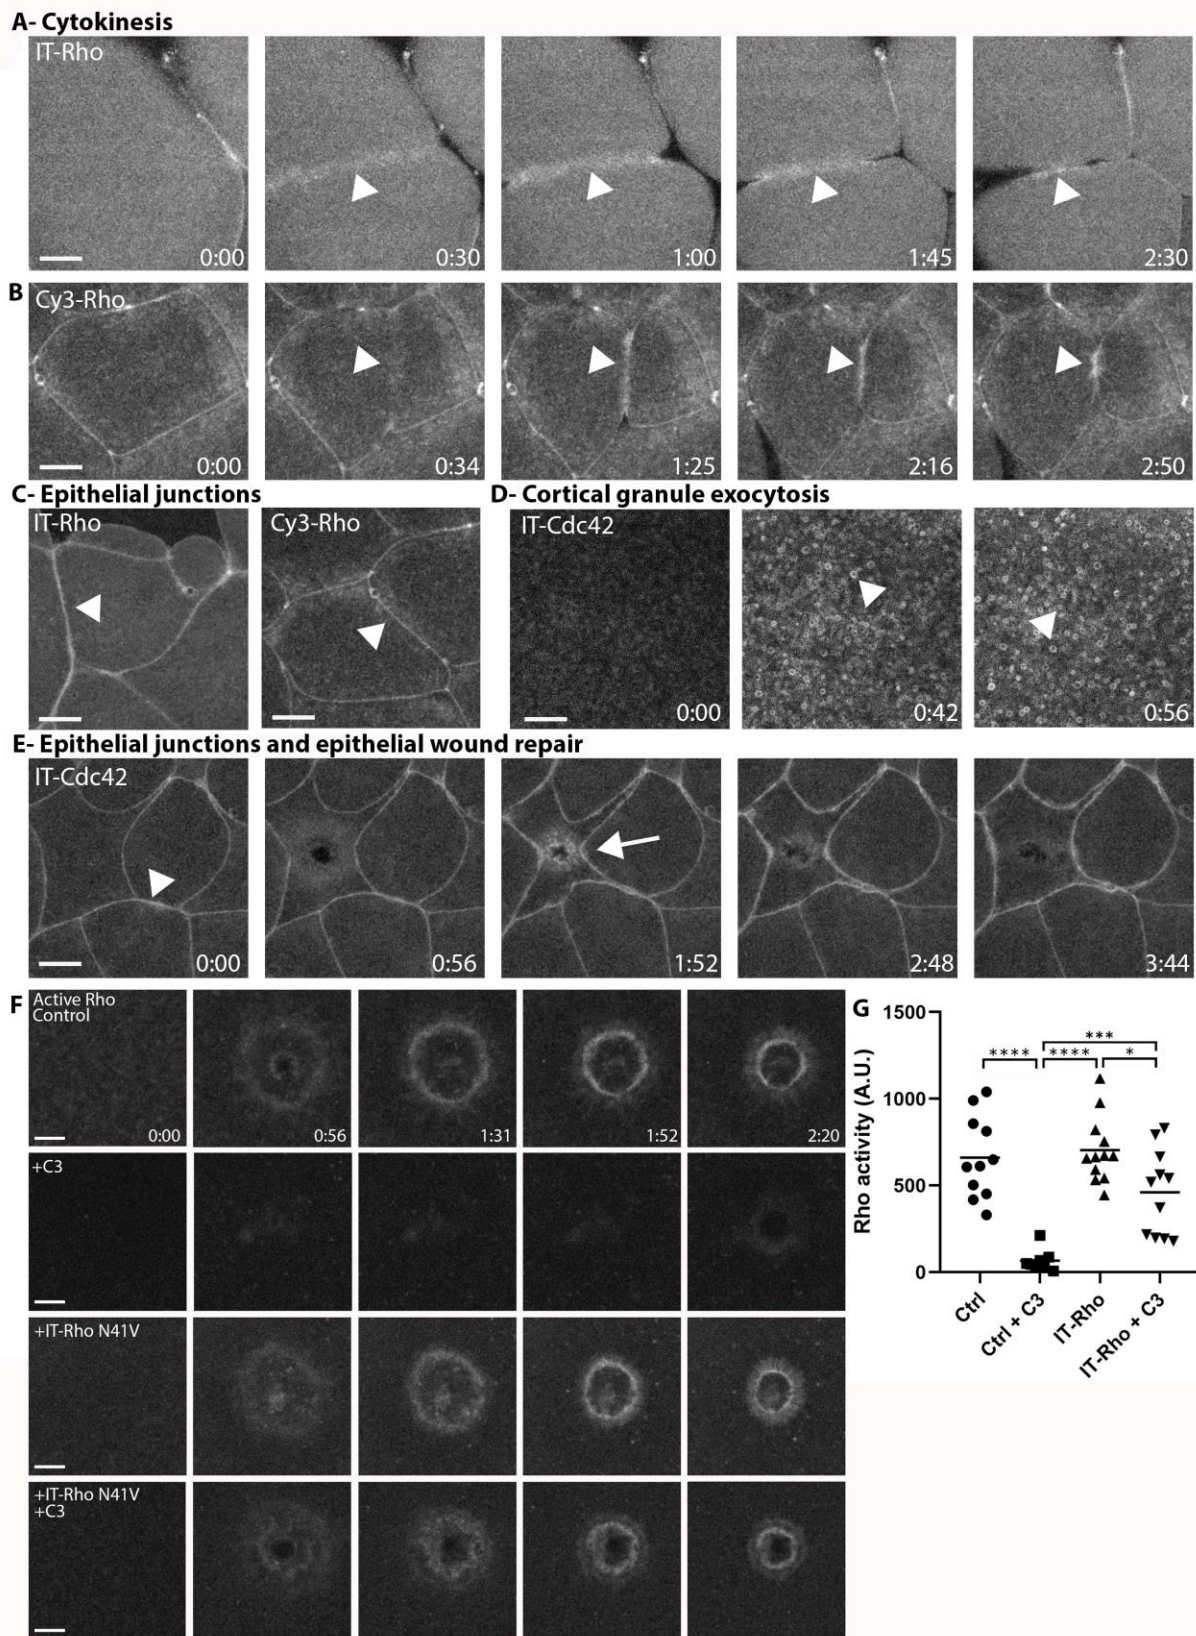

1030 **Figure 3**

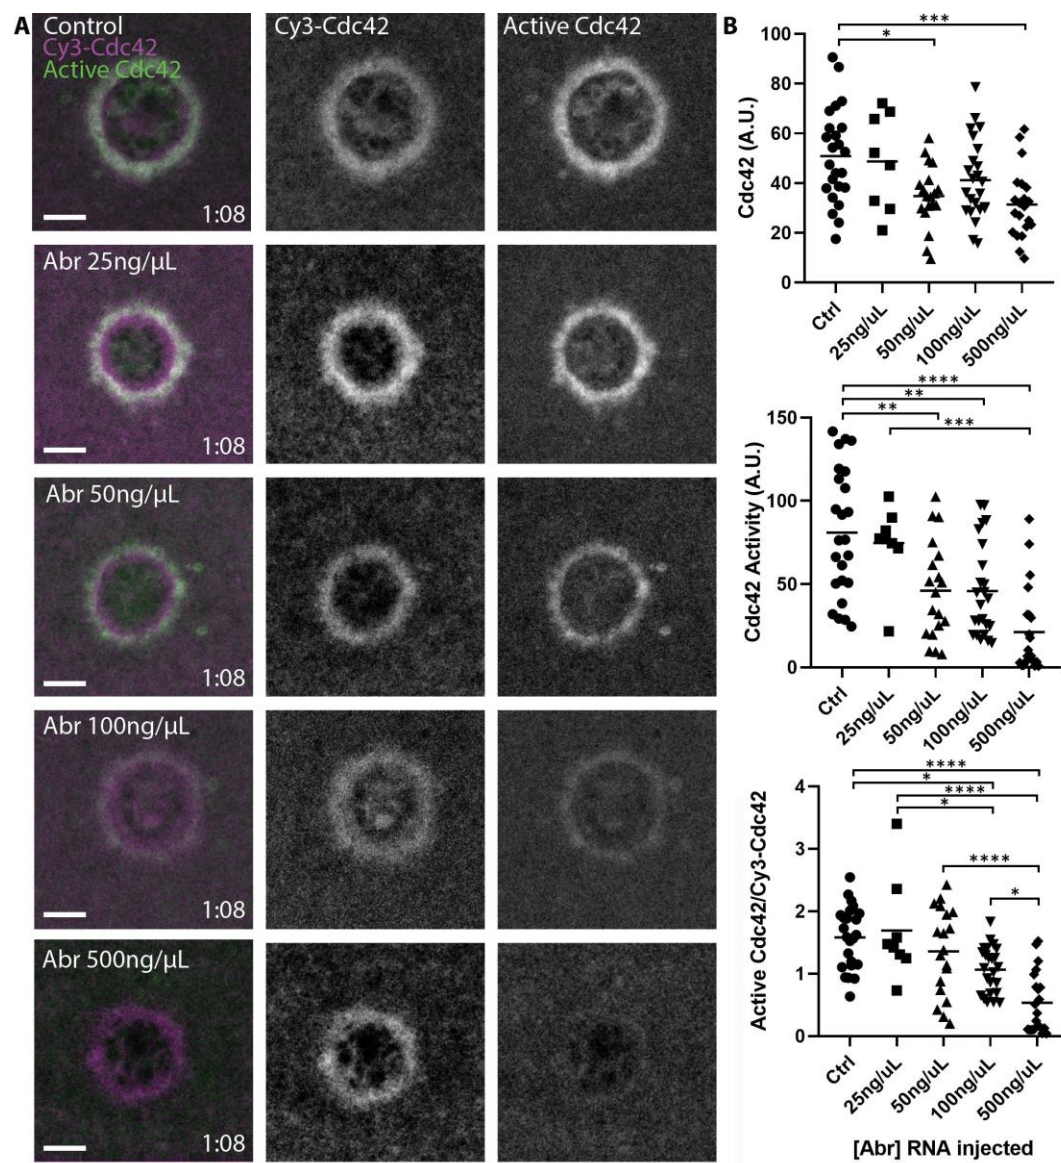

1031

1032

1033

1034

1035

1036 **Figure 4**

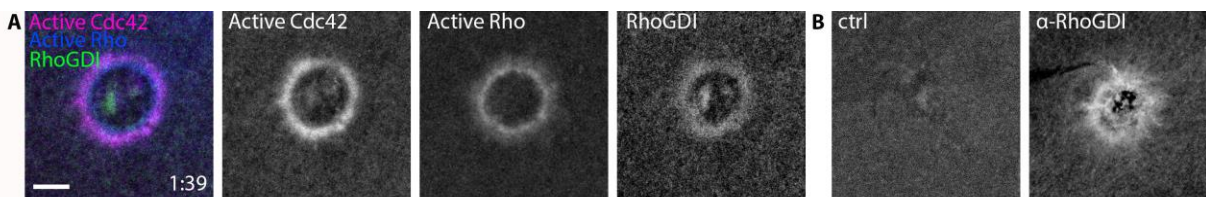

1037

1038



1039 **Figure 5**

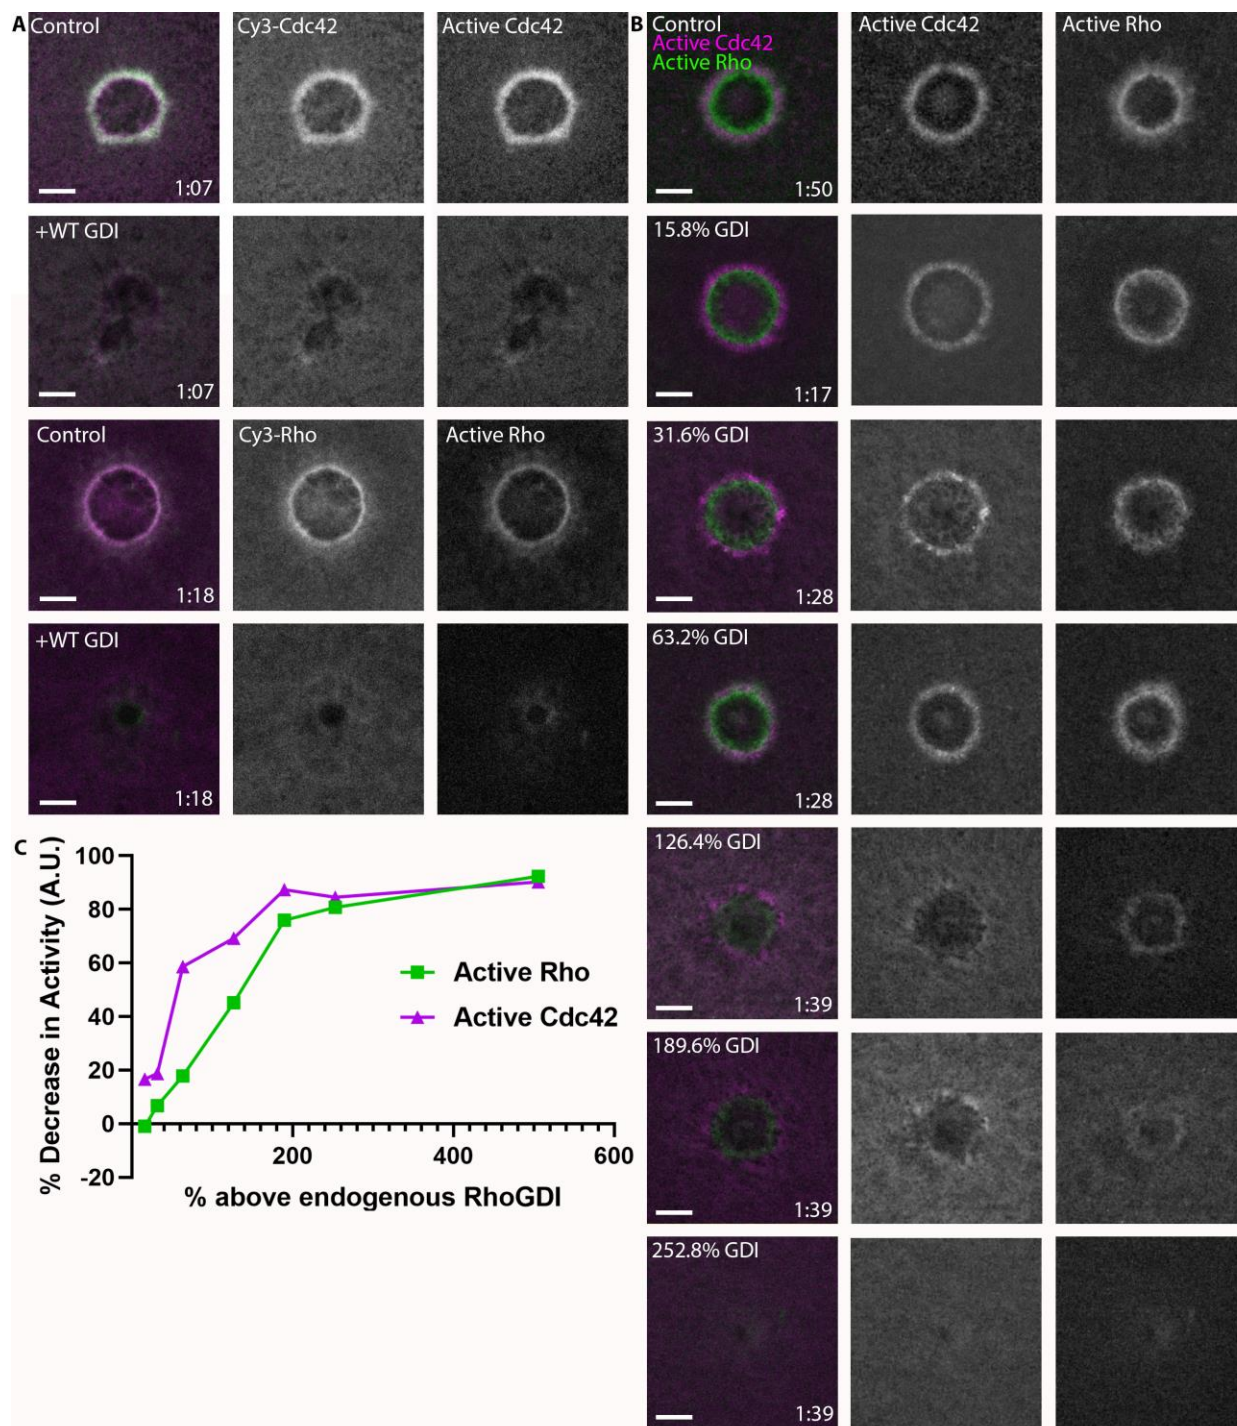

1040

1041 **Figure 6**

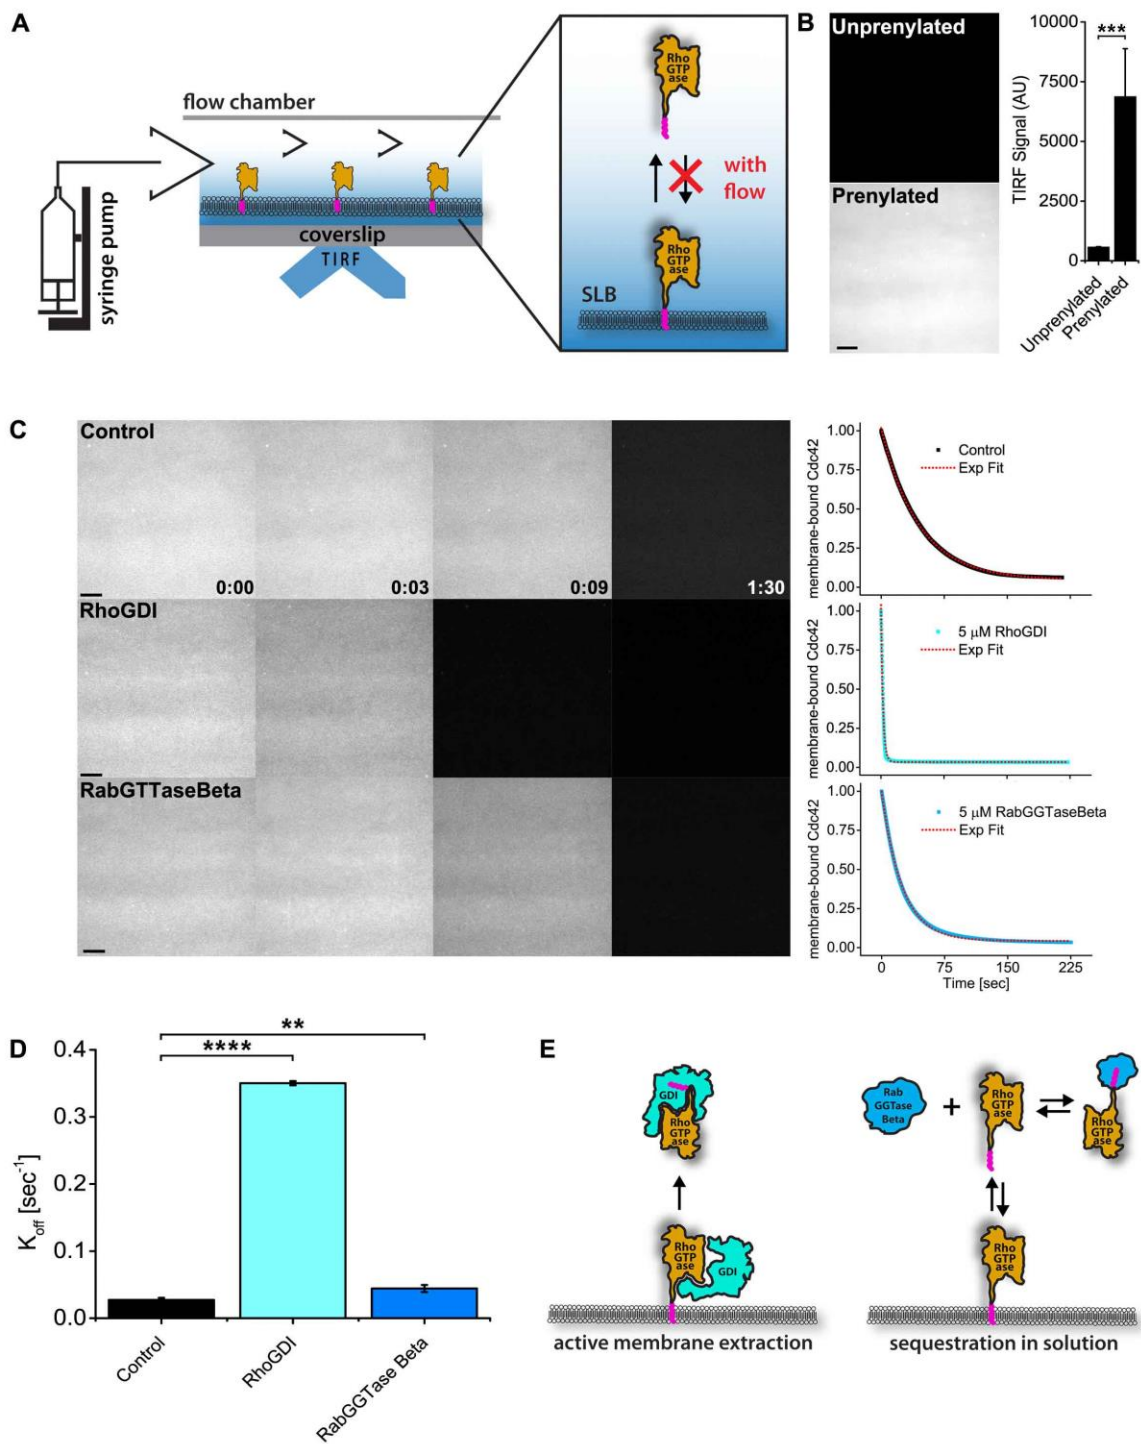

1043 **Figure 7**

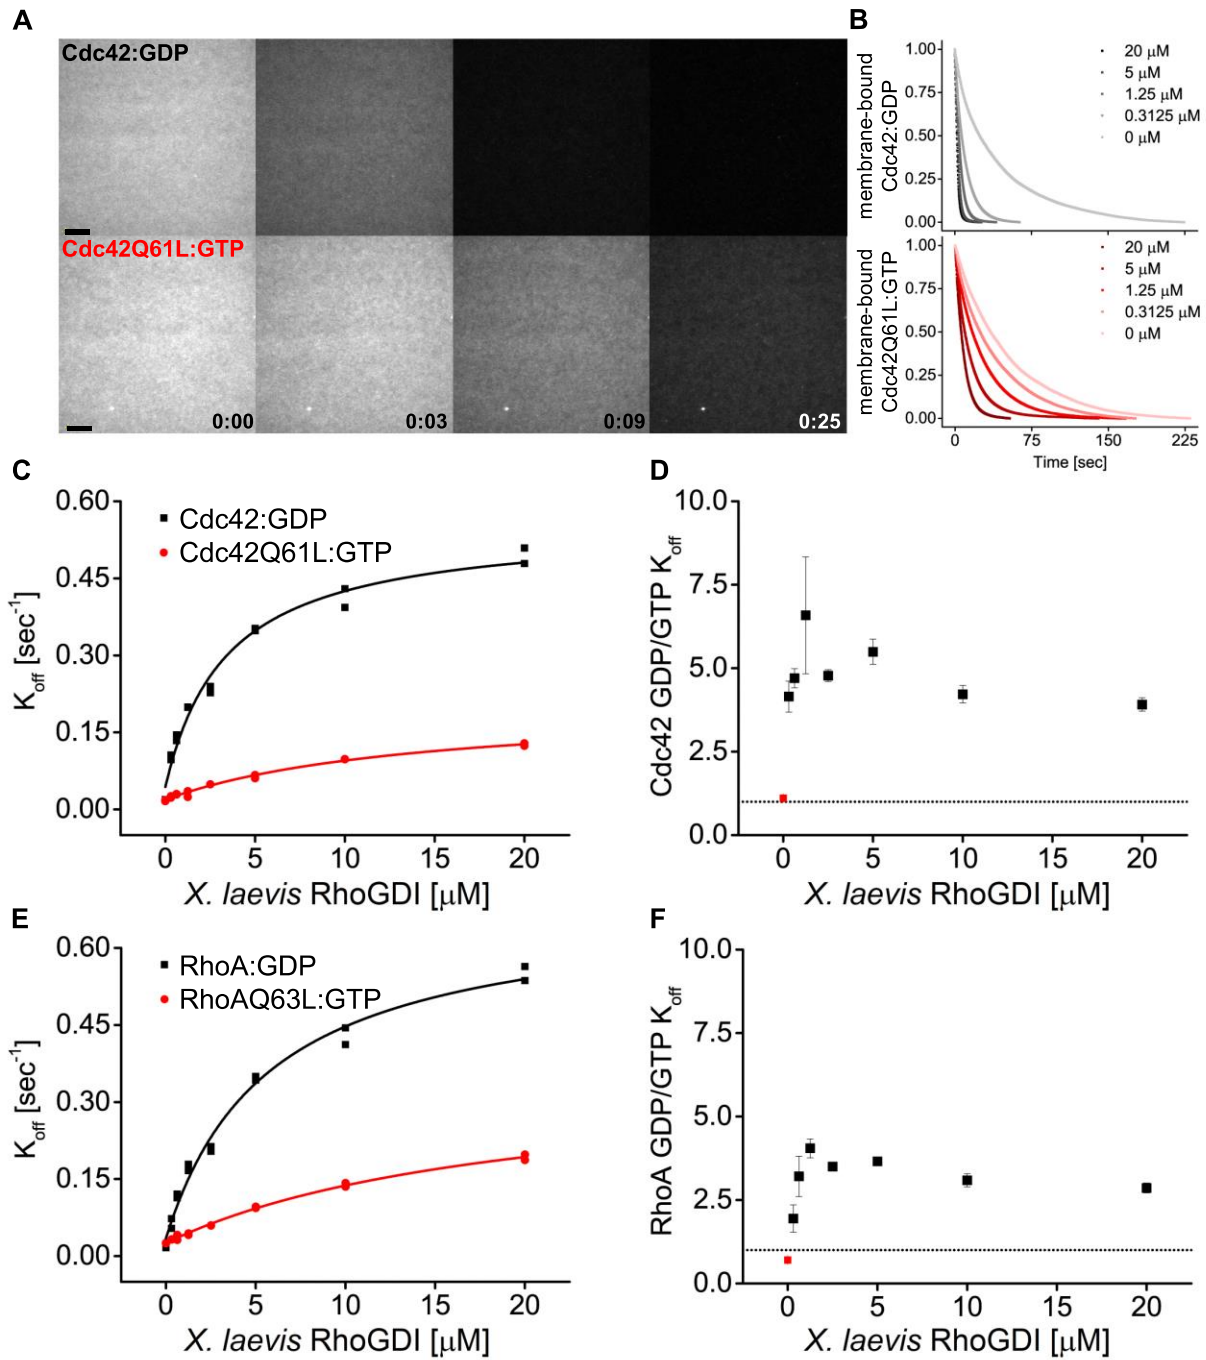

1044

1045

1046

1047 **Figure 8**

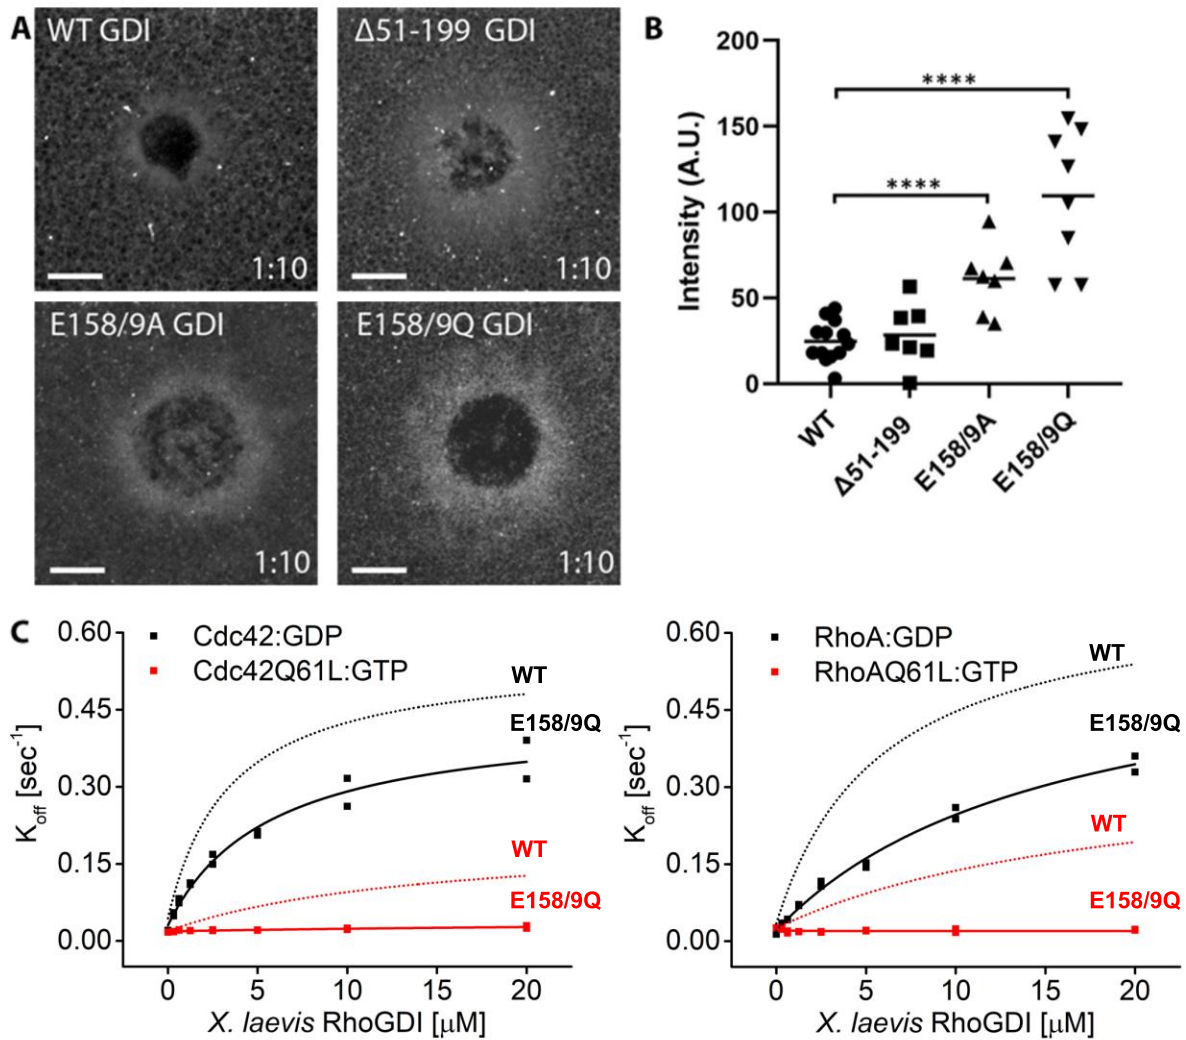

1048

1049

1050

1051

1052

1053

1054 **Figure 9**

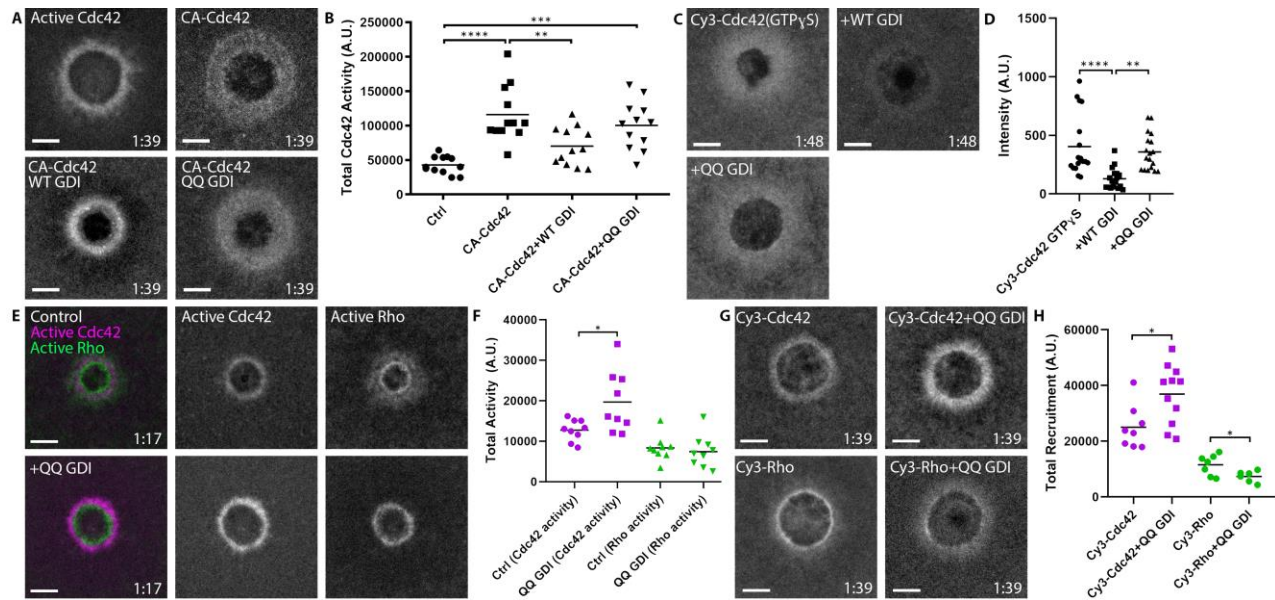

1055

1056

1057

1058

1059

1060

1061

1062

1063

1064

1065

1066

1067 **Figure 10**

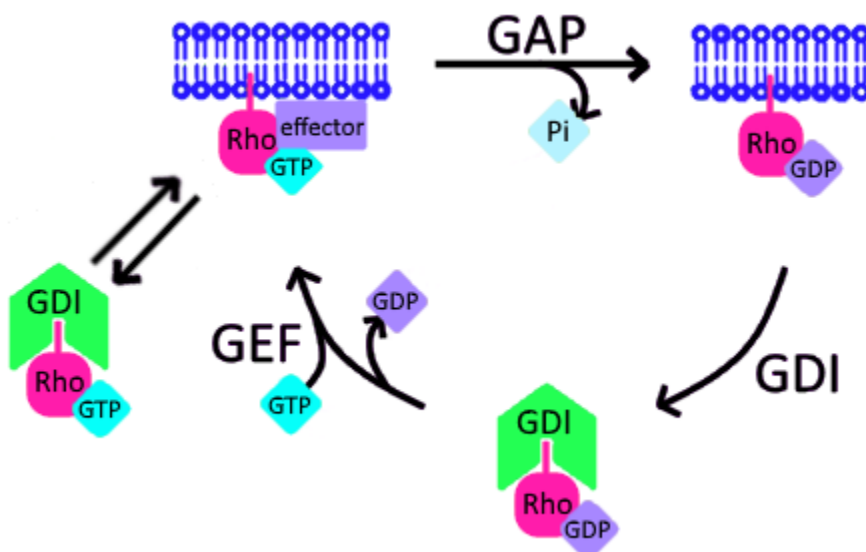

1068

1069

1070

1071

1072

1073

1074

1075

1076

1077

1078

1079 **Supplemental Table 1: Primers.**

| Primer Name           | Primer sequence (5'-3')                                           |
|-----------------------|-------------------------------------------------------------------|
| Cdc42(1)              | cccgggcccgggaattcatgcagacaattaaatggtgtagctgtgg                    |
| Cdc42(2)              | cgcgccagagcatgcggatccgccagactgtttgtttttgccag                      |
| Cdc42(3)              | gatccgcatgctctggcgcgccgggcaaaccaatc                               |
| Cdc42(4)              | cccgcgcggccctcagttatagcagcatacactgcgtttctc                        |
| Cdc42(Q61L)fwd        | cttttgatactgcagggtagaggattatgacagattacg                           |
| Cdc42(Q61L)rev        | cgtaatctgtcataatcctctagccctgcagtatcaaaaag                         |
| Cdc42(G12V)fwd        | gtgtgtgtgggcgatgttgctgttggtgaaaacatg                              |
| Cdc42(G12V)rev        | catgtttaccaacagcaacatcgcccacaacaacac                              |
| GTPase(GeneStrand)fwd | gagaatctttatttcagggc                                              |
| GTPase(GeneStrand)rev | ggtggtggtgctcgagtgc                                               |
| Cdc42(Sf9)fwd         | ccactactgagaatctttatttcaggggtggtggtggtggtatgcagacaattaaagtgtgtgtg |
| Cdc42(Sf9)rev         | gcaggctctagattcgaaagcgttattatagcagcacacacctgcgg                   |
| pETfwd                | ggccgcactcgagcaccacc                                              |
| pETrev                | cgccctgaaaataaagattctc                                            |
| pFASTBacH10fwd        | cgcttcgaatctagagcctgc                                             |
| pFASTBacH10rev        | ctgaaaataaagattctcagtagtgg                                        |
| pCS2+-Cdc42(1)        | cttgttcttttgcaggaaaccatcgattcgaattcatgcagac                       |
| pCS2+-Cdc42(2)        | tcgaatcgatggtttcctgcaaaaagaacaagtagcttgtattc                      |
| Rac(1)                | cccgggcccgggaattcatgcaggccattaaatgtgtgg                           |
| Rac(2)                | cgcgccagagcatgcggatccgccagagagtttctttcttcagcttctcaatagtgc         |
| Rac(3)                | gatccgcatgctctggcgcgccgggacccc                                    |
| Rac(4)                | cccgcgcggccctcagttacaacagccgacatcttc                              |
| pCS2+-Rac(1)          | cttttgcaggcccccatcgatatgcagccattaaatgtg                           |
| pCS2+-Rac(2)          | gcctgcatacgcgatgggggcctgcaaaaagaacaagtagc                         |
| Rho(1)                | cccgggcccgggaattcatggcagccattcgtagaagctcg                         |
| Rho(2)                | cgcgccagagcatgcggatccgccagactgtttcattttggtgagctcct                |
| Rho(3)                | gatccgcatgctctggcgcgccgggagcctgtgaag                              |
| Rho(4)                | cccgcgcggccctcagttatagatgagaaggcacgtgg                            |
| RhoA(Q63L)fwd         | gggacacagctgggctggaagattatgatcgc                                  |
| RhoA(Q63L)rev         | gcgatcataatctccagcccagctgtgtccc                                   |
| RhoA(G14V)fwd         | atgtttccacaggctacatccaacaacacc                                    |
| RhoA(G14V)rev         | ggtgattgttggtgatgtgcctgtgaaagacat                                 |
| RhoA(Sf9)fwd          | ccactactgagaatctttatttcaggggtggtggtggtggtatggctgccatccggaagaac    |
| RhoA(Sf9)rev          | gcaggctctagattcgaaagcgttattacaagacaaggcaaccagatttttc              |
| pCS2+-Rho(1)          | caagctactgttcttttgcaggatggcatcgattcgaattc                         |
| pCS2+-Rho(2)          | ggctgccatgaattcgaatcgatgccatcctgcaaaaagaac                        |
| eGFP(1)               | ctggcggatccatggtgagcaagg                                          |
| eGFP(2)               | gcattggcgcgccctgtacagctc                                          |
| 8(A)F1                | ggcgtgcagctgtggcagcagcagtcgaactgaac                               |
| 8(A)F2                | ggccgcaaaggcaggcatcaagcatggcgtgcagctg                             |
| 8(A)F3                | gatcccatgattcgaattcatggccgcaaaggcag                               |

|                   |                                                                       |
|-------------------|-----------------------------------------------------------------------|
| 8(A)F4            | cgagctgtacaagtccggaatggccgcaaaggcag                                   |
| R1                | cactatagttctagaggctcagttaatctttccactcttc                              |
| R2                | gaattcgaagcttgagctcgacgtaatctttccactc                                 |
| HR F1             | ggacaagggaggtggtggaagtggaggaggttctgcccaggatggatcc                     |
| HR F2             | tgaactacaaggccccggagatgaaatctctgcaggaaatccaagagttggacaagggag          |
| HR F3             | catcaagcatggcgaggagggtggaagaagaagtcgaactgaactacaag                    |
| HR F4             | gatcccatcgattcgaattcatggccgacaaggatggcatcaagcatgg                     |
| HR F5             | cgagctgtacaagtccggaatggccgacaaggatggcatcaagcatgg                      |
| (-)20 F1          | ggatcccatcgattcgaattcatgaactacaaggccccg                               |
| (-)20 F2          | gctgtacaagtccggatgaactacaaggcccc                                      |
| (-)55 F1          | gatcccatcgattcgaattcatggcccaagtggatcctaacttc                          |
| (-)55 F2          | cgagctgtacaagtccggaatggcccaagtggatcctaacttc                           |
| XIRhoGDI fwd      | ctgtccagggggcccctgggatcctgtatggccgacaaggatggc                         |
| XIRhoGDI rev      | gatcgtcagtcagtcacgatcggccgcttatcaatctttccactctttcttatgg               |
| E163/4Q fwd       | gtatgagttcctgacccccatgcagcaggcgccaagggcatgc                           |
| E163/4Q rev       | gcatgcccttggcgccctgctgcatgggggtcaggaactatac                           |
| $\Delta$ 1-22 fwd | ctgtccagggggcccctgggatcctgtcactcagtcactataagc                         |
| $\Delta$ 1-22 rev | cgtcagtcagtcacgatcggccgctcagtccttc                                    |
| $\Delta$ 1-59 fwd | ctgtccagggggcccctgggatcctgtgctgtgctgacccc                             |
| $\Delta$ 1-59 rev | cgtcagtcagtcacgatcggccgctcagtccttc                                    |
| HR fwd            | gtggtggaagtggaggagggttctgctgtgctgacccc                                |
| HR rev            | ctctccaccactccaccactcccttatagttgactgagtgctcg                          |
| pGEXHR fwd        | cgagcactcagtcactataagggaggtggtggaagtggaggaggttctgctgtgctg<br>ctgacccc |
| pGEXHR rev        | cgagcactcagtcactataagggaggtggtggaagtggaggaggag                        |



1081 **Supplemental Figure 1**

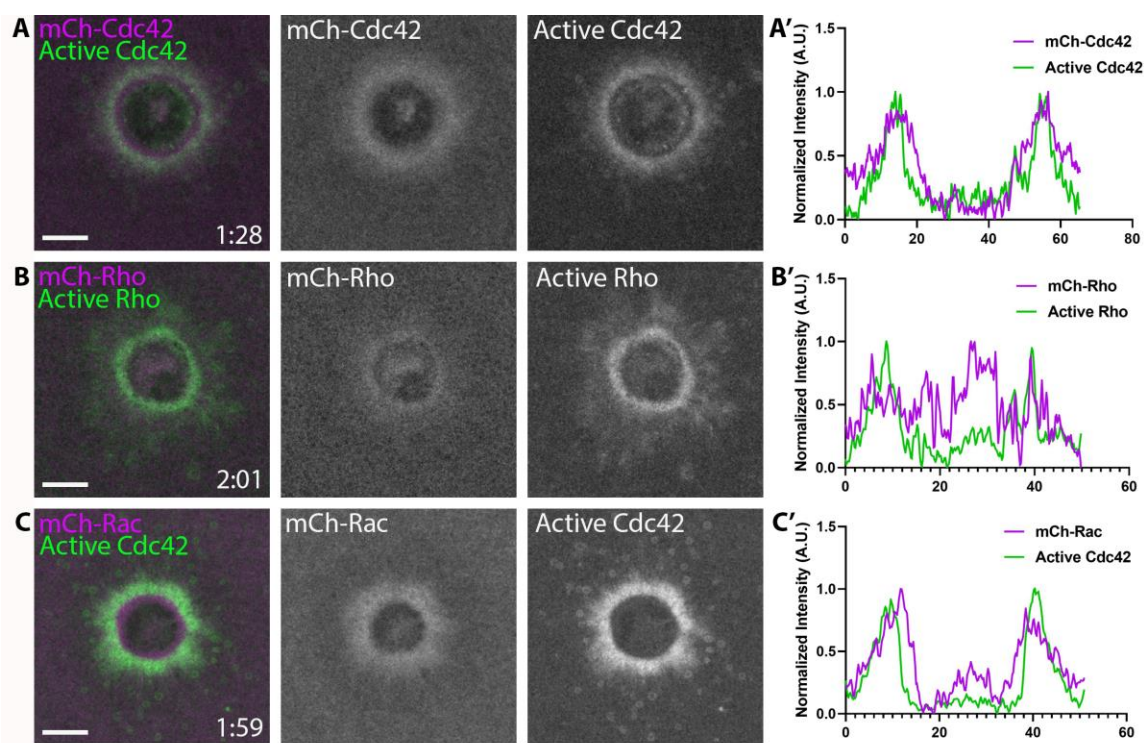

1082

1083

1084

1085

1086

1087

1088

1089

1090

1091

1092 **Supplemental Figure 2**

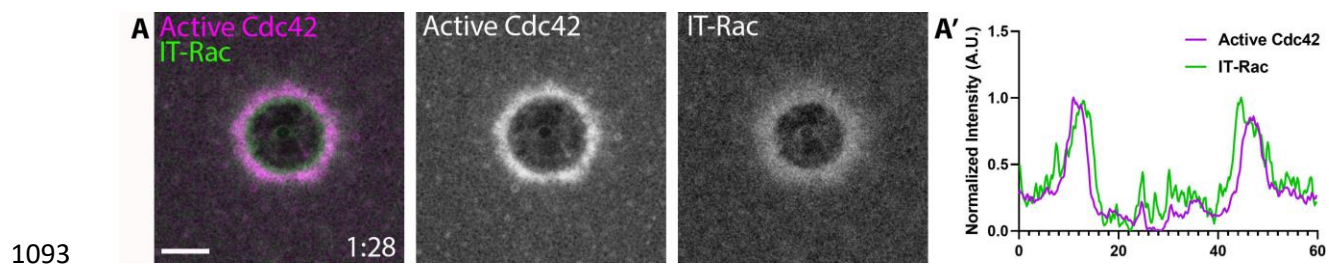

1094

1095

1096

1097

1098

1099

1100

1101

1102

1103

1104

1105

1106

1107

1108 **Supplemental Figure 3**

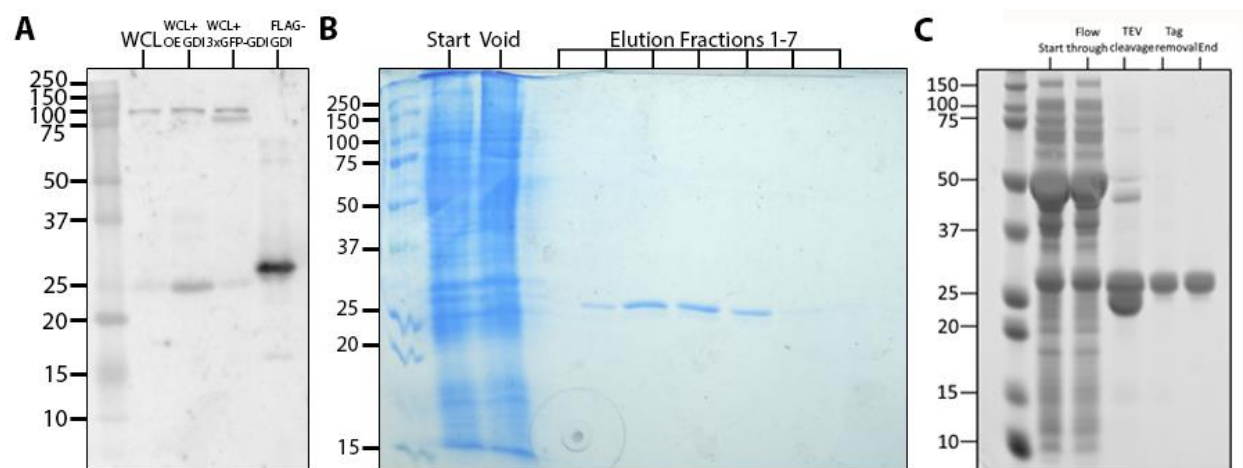

1109

1110

1111

1112

1113

1114

1115

1116

1117

1118

1119

1120

1121

1122 **Supplemental Figure 4**

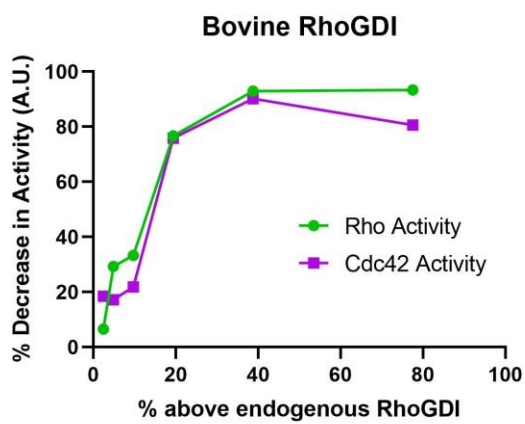

1123

1124

1125

1126

1127

1128

1129

1130

1131

1132

1133

1134

1135

1136 **Supplemental Figure 5**

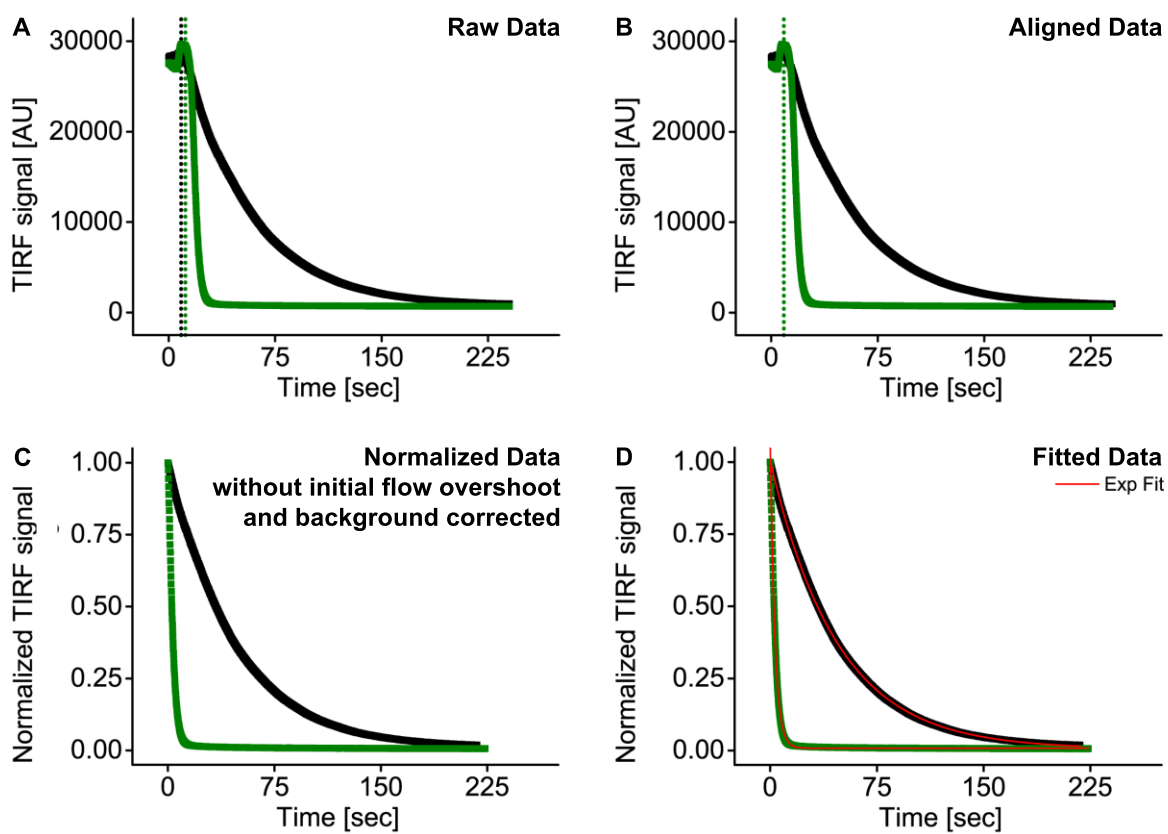

1137

1138

1139

1140

1141

1142

1143

1144

1145 **Supplemental Figure 6**

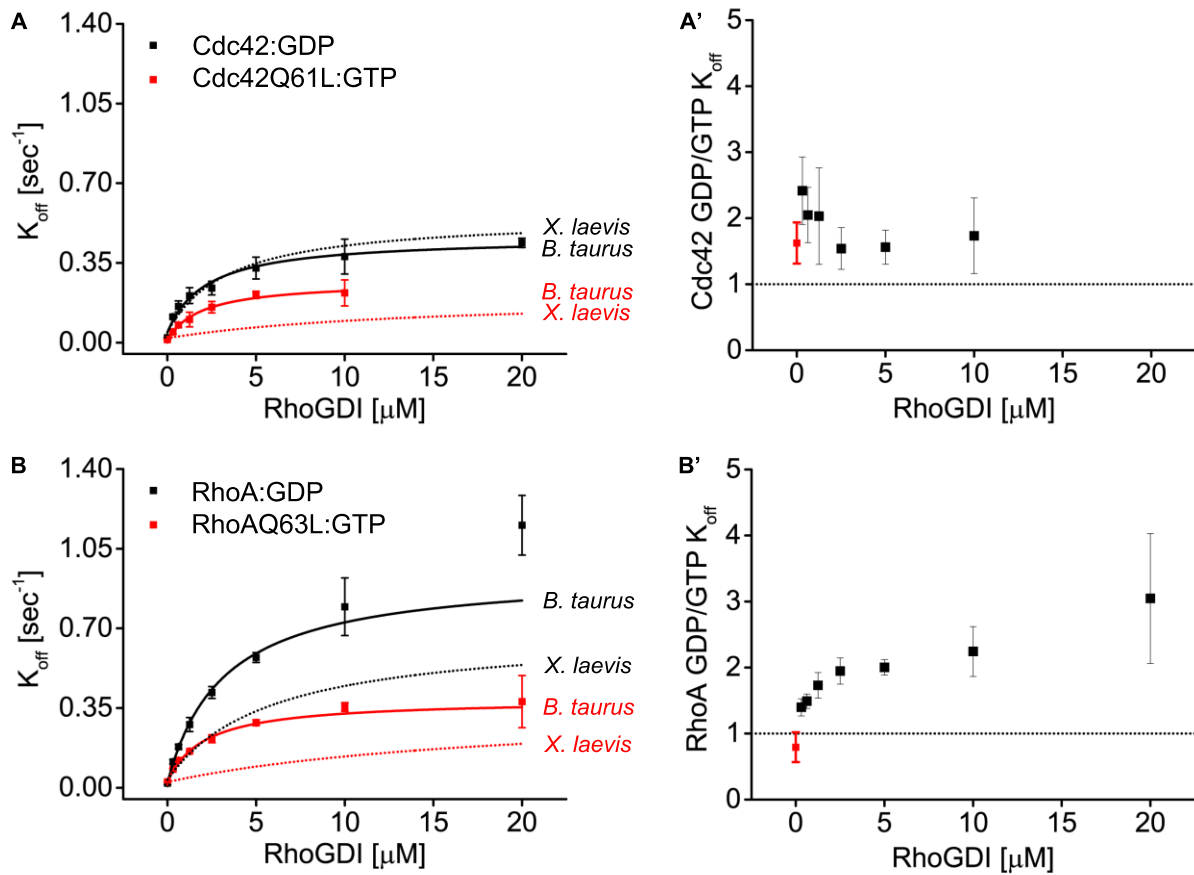

1146

1147

1148

1149

1150

1151

1152

1153

1154 Supplemental Figure 7

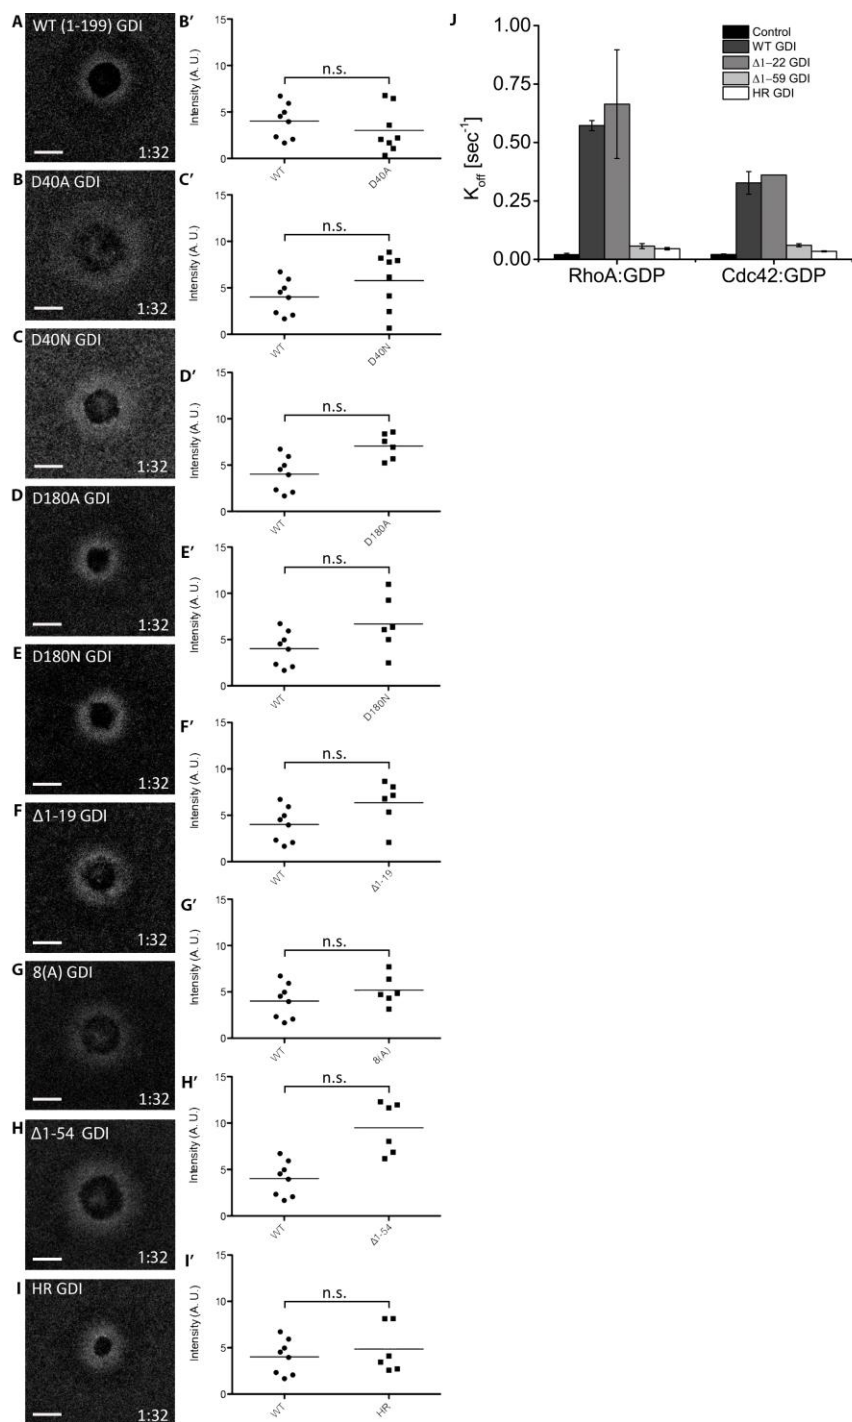

1156 **Supplemental Figure 8**

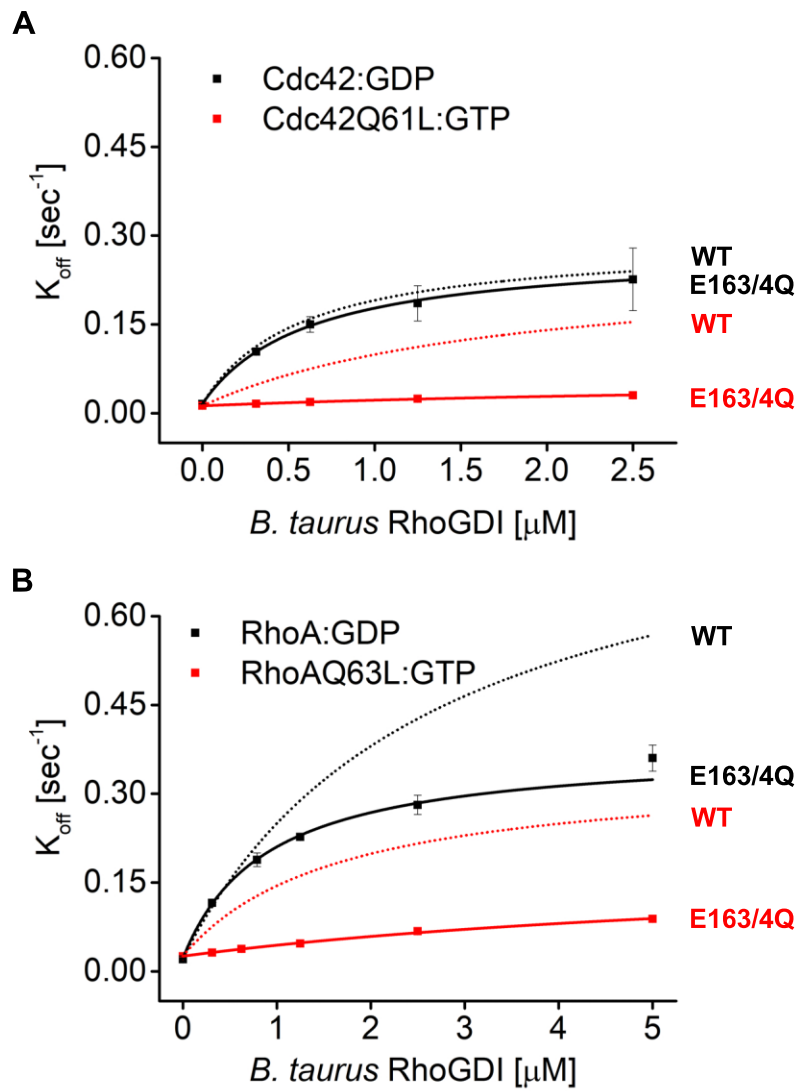

1157

1158

1159

1160

1161



1162 **Supplemental Figure 9**

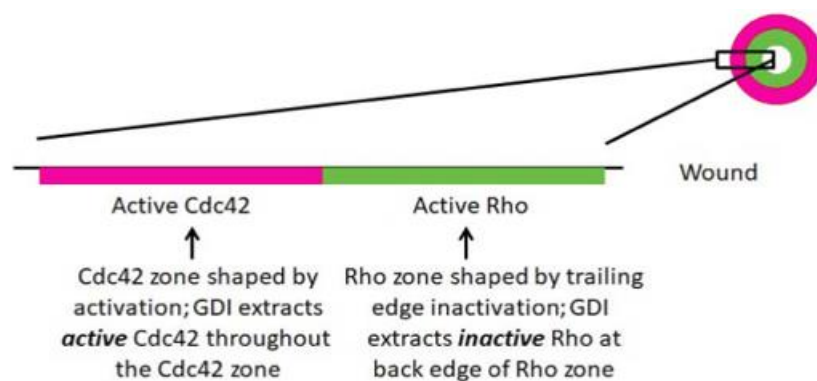

1163

1164

1165

1166

1167

1168

1169

1170

1171

1172

1173

1174

1175

1176 **Supplemental Figure 10**

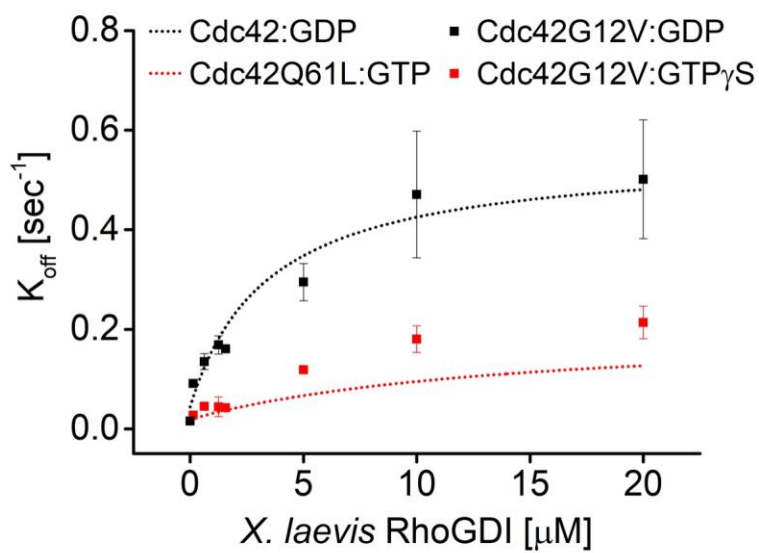

1177

1178

1179

1180

1181

1182

1183

1184

1185

1186

1187

1188

1189 **Supplemental Figure 11**

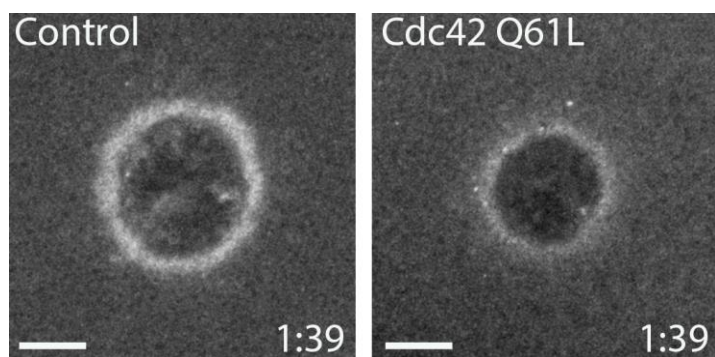

1191

1192

1193

1194

1195
